# Supplementary material for: Integrated analysis of transcriptomic and proteomic data from tree peony (P. ostii) seeds reveals key developmental stages and candidate genes related to oil biosynthesis and fatty acid metabolism
Source: PubMed Central journal article supplement (PMC6804530; doi:10.1038/s41438-019-0194-7), 2019-10-01

**Integrated analysis of transcriptomic and proteomic data from tree peony (*P. ostii*) seeds reveals key developmental stages and candidate genes related to oil biosynthesis and fatty acid metabolism**

Xiaojing Wang <sup>1</sup>, Haiying Liang <sup>2</sup>, Dalong Guo<sup>3</sup>, Lili Guo <sup>1</sup>, Xiangguang Duan <sup>1</sup>,

Qishi Jia <sup>1</sup>, Xiaogai Hou <sup>1\*</sup>

**Supporting information**

**Table S1.** Summary of sequencing data of *P. ostii* seeds and alignment information of clean reads.

| Sample    | Raw Data Size<br>(bp) | Raw Data<br>Number | Clean Data<br>Number | Clean Data<br>Rate (%) | Total Mapped<br>Reads (%) | Unique Match<br>(%) | Multi-position<br>Match (%) |
|-----------|-----------------------|--------------------|----------------------|------------------------|---------------------------|---------------------|-----------------------------|
| 25 DAP_1  | 1206863350            | 24137264           | 24114971             | 99.90                  | 59.22                     | 42.11               | 17.11                       |
| 25 DAP_2  | 1206863350            | 24136880           | 24116796             | 99.91                  | 59.47                     | 42.29               | 17.18                       |
| 32 DAP_1  | 1206863350            | 24137240           | 24040658             | 99.59                  | 63.43                     | 45.39               | 18.03                       |
| 32 DAP_2  | 1206863350            | 24137468           | 24019317             | 99.51                  | 63.01                     | 45.14               | 17.87                       |
| 39 DAP_1  | 1206863350            | 24137118           | 24078445             | 99.75                  | 56.24                     | 39.62               | 16.63                       |
| 39 DAP_2  | 1206863350            | 24137409           | 24055346             | 99.66                  | 57.53                     | 40.50               | 17.02                       |
| 53 DAP_1  | 1206863350            | 24137222           | 24092972             | 99.81                  | 51.10                     | 39.55               | 11.56                       |
| 53 DAP_2  | 1206863350            | 24137299           | 24112567             | 99.89                  | 51.03                     | 39.50               | 11.53                       |
| 67 DAP_1  | 1206863350            | 24137353           | 24113946             | 99.90                  | 53.85                     | 42.57               | 11.28                       |
| 67 DAP_2  | 1206863350            | 24137486           | 24110018             | 99.88                  | 53.78                     | 42.50               | 11.29                       |
| 81 DAP_1  | 1206863350            | 24137221           | 24113728             | 99.90                  | 49.13                     | 38.39               | 10.74                       |
| 81 DAP_2  | 1206863350            | 24137260           | 24115643             | 99.10                  | 49.48                     | 38.79               | 10.69                       |
| 88 DAP_1  | 1206846350            | 24136927           | 24115340             | 99.91                  | 47.33                     | 37.97               | 9.36                        |
| 88 DAP_2  | 1206863350            | 24137267           | 24115968             | 99.91                  | 46.46                     | 37.45               | 9.01                        |
| 95 DAP_1  | 1206863350            | 24137370           | 24113203             | 99.89                  | 53.49                     | 42.84               | 10.64                       |
| 95 DAP_2  | 1206863350            | 24137099           | 24115207             | 99.90                  | 53.57                     | 42.93               | 10.63                       |
| 109 DAP_1 | 1206863350            | 24137291           | 24045153             | 99.61                  | 49.03                     | 37.90               | 11.14                       |
| 109 DAP_2 | 1206863350            | 24137012           | 24090253             | 99.80                  | 49.36                     | 37.79               | 11.57                       |

**Table S2.** The common unique genes between *P. ostii* seeds from the two peony trees.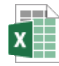

Table S2.xlsx

**Table S3.** Significantly enriched GO biological processes in *P. ostii* seeds of different development period ( $P < 0.05$ ).

| GO biological processes                     | DEGs with GO annotation | All genes with GO annotation | Corrected P-value |
|---------------------------------------------|-------------------------|------------------------------|-------------------|
| <b>32 DAP-vs- 25 DAP</b>                    |                         |                              |                   |
| Nucleosome organization                     | 49                      | 82                           | 8.89e-12          |
| Protein-DNA complex subunit organization    | 82                      | 82                           | 8.89e-12          |
| Chromatin organization                      | 54                      | 112                          | 1.11e-07          |
| Macromolecular complex subunit organization | 67                      | 185                          | 0.00049           |
| <b>53 DAP-vs- 25 DAP</b>                    |                         |                              |                   |
| Phenylpropanoid biosynthetic process        | 14                      | 16                           | 0.01912           |
| Secondary metabolite biosynthetic process   | 14                      | 16                           | 0.01912           |
| Nucleosome organization                     | 47                      | 82                           | 0.03219           |
| Protein-DNA complex subunit organization    | 47                      | 82                           | 0.03219           |
| <b>81 DAP-vs- 25 DAP</b>                    |                         |                              |                   |
| Nucleosome organization                     | 23                      | 43                           | 0.0014            |
| Protein-DNA complex subunit organization    | 49                      | 119                          | 0.0014            |
| <b>88 DAP-vs- 25 DAP</b>                    |                         |                              |                   |
| Nucleosome organization                     | 60                      | 82                           | 0.0016            |
| Protein-DNA complex subunit organization    | 60                      | 82                           | 0.0016            |
| <b>95 DAP-vs- 25 DAP</b>                    |                         |                              |                   |
| Metabolic process                           | 3308                    | 6200                         | 0.01279           |

**Significantly enriched GO cellular components in *P. ostii* seeds of different development period ( $P < 0.05$ ).**

| GO cellular components                       | DEGs with GO annotation | All genes with GO annotation | Corrected P-value |
|----------------------------------------------|-------------------------|------------------------------|-------------------|
| <b>32 DAP-vs- 25 DAP</b>                     |                         |                              |                   |
| Chromatin                                    | 43                      | 73                           | 8.79e-10          |
| Chromosomal part                             | 49                      | 108                          | 5.25e-06          |
| Chromosome                                   | 51                      | 115                          | 6.99e-06          |
| Thylakoid                                    | 47                      | 114                          | 0.00030           |
| Plastid                                      | 136                     | 444                          | 0.00073           |
| Intracellular membrane-bounded organelle     | 414                     | 1653                         | 0.02279           |
| Non-membrane-bounded organelle               | 66                      | 202                          | 0.02904           |
| Intracellular non-membrane-bounded organelle | 66                      | 202                          | 0.02904           |

| <b>39 DAP-vs- 25 DAP</b>                |     |      |          |
|-----------------------------------------|-----|------|----------|
| Intrinsic component of membrane         | 288 | 1051 | 0.00118  |
| Membrane part                           | 322 | 1215 | 0.00688  |
| Membrane                                | 420 | 1650 | 0.02134  |
| Endoplasmic reticulum                   | 15  | 28   | 0.03381  |
| <b>53 DAP-vs- 25 DAP</b>                |     |      |          |
| Thylakoid                               | 62  | 114  | 0.00105  |
| <b>67 DAP-vs- 25 DAP</b>                |     |      |          |
| Thylakoid                               | 63  | 114  | 0.03368  |
| <b>81 DAP-vs- 25 DAP</b>                |     |      |          |
| Chromatin                               | 51  | 73   | 0.00116  |
| Mitochondrial part                      | 45  | 63   | 0.00161  |
| Mitochondrion                           | 46  | 66   | 0.00363  |
| Mitochondrial envelope                  | 39  | 55   | 0.00832  |
| <b>88 DAP-vs- 25 DAP</b>                |     |      |          |
| Intracellular ribonucleoprotein complex | 281 | 470  | 2.89e-09 |
| Ribonucleoprotein complex               | 281 | 470  | 2.89e-09 |
| Macromolecular complex                  | 557 | 1087 | 0.00057  |
| Chromatin                               | 52  | 73   | 0.00083  |
| <b>95 DAP-vs- 25 DAP</b>                |     |      |          |
| Intracellular ribonucleoprotein complex | 325 | 470  | 1.37e-12 |
| Ribonucleoprotein complex               | 325 | 470  | 1.37e-12 |
| Macromolecular complex                  | 639 | 1087 | 0.00020  |
| <b>109 DAP-vs- 25 DAP</b>               |     |      |          |
| Proteasome complex                      | 35  | 44   | 0.02893  |
| Peptidase complex                       | 35  | 44   | 0.02893  |
| Endopeptidase complex                   | 35  | 44   | 0.02893  |

Significantly enriched GO molecular functions in *P. ostii* seeds of different development period ( $P < 0.05$ ).

| <b>GO molecular functions</b>                        | <b>DEGs with GO annotation</b> | <b>All genes with GO annotation</b> | <b>Corrected P-value</b> |
|------------------------------------------------------|--------------------------------|-------------------------------------|--------------------------|
| <b>39 DAP-vs- 25 DAP</b>                             |                                |                                     |                          |
| Hydrolase activity, acting on glycosyl bonds         | 119                            | 329                                 | 8.82e-06                 |
| Carboxypeptidase activity                            | 20                             | 32                                  | 0.00060                  |
| Hydrolase activity, hydrolyzing O-glycosyl compounds | 81                             | 224                                 | 0.00145                  |
| Iron ion binding                                     | 91                             | 259                                 | 0.00153                  |
| Oxidoreductase activity                              | 339                            | 1205                                | 0.00183                  |
| Beta-glucosidase activity                            | 15                             | 25                                  | 0.02384                  |
| Glucosidase activity                                 | 30                             | 68                                  | 0.02828                  |
| <b>67 DAP-vs- 25 DAP</b>                             |                                |                                     |                          |
| Hydrolase activity, acting on glycosyl bonds         | 160                            | 329                                 | 0.04694                  |

| <b>88 DAP-vs- 25 DAP</b>                                 |      |      |          |
|----------------------------------------------------------|------|------|----------|
| Structural molecule activity                             | 241  | 399  | 7.64e-09 |
| <b>95 DAP-vs- 25 DAP</b>                                 |      |      |          |
| Structural molecule activity                             | 281  | 399  | 1.42e-13 |
| <b>109 DAP-vs- 25 DAP</b>                                |      |      |          |
| Catalytic activity                                       | 3881 | 7135 | 1.30e-05 |
| Oxidoreductase activity, acting on CH-OH group of donors | 129  | 194  | 0.02245  |

**Table S4.** All genes and proteins associated with lipid metabolism identified in the transcriptome and proteome.

| <b>Lipid metabolism pathway</b>            | <b>All genes with pathway annotation (28112)</b> | <b>All proteins with pathway annotation (2475)</b> | <b>Pathway ID</b> |
|--------------------------------------------|--------------------------------------------------|----------------------------------------------------|-------------------|
| Fatty acid metabolism                      | 211 (0.75%)                                      | 35 (1.41%)                                         | ko01212           |
| Fatty acid biosynthesis                    | 93 (0.33%)                                       | 26 (1.05%)                                         | ko00061           |
| Fatty acid degradation                     | 98 (0.35%)                                       | 31 (1.25%)                                         | ko00071           |
| Fatty acid elongation                      | 131 (0.47%)                                      | 7 (0.28%)                                          | ko00062           |
| UFA biosynthesis                           | 63 (0.22%)                                       | 11 (0.44%)                                         | ko01040           |
| Linoleic acid metabolism                   | 46 (0.16%)                                       | 11 (0.44%)                                         | ko00591           |
| ALA metabolism                             | 115 (0.41%)                                      | 24 (0.97%)                                         | ko00592           |
| Steroid biosynthesis                       | 80 (0.28%)                                       | 8 (0.32%)                                          | ko00100           |
| Sphingolipid metabolism                    | 141 (0.5%)                                       | 19 (0.77%)                                         | ko00600           |
| Glycerolipid metabolism                    | 306 (1.09%)                                      | 24 (0.97%)                                         | ko00561           |
| Ether lipid metabolism                     | 122 (0.43%)                                      | 10 (0.4%)                                          | ko00565           |
| Arachidonic acid metabolism                | 69 (0.25%)                                       | 17 (0.69%)                                         | ko00590           |
| Glycerophospholipid metabolism             | 306 (1.09%)                                      | 27 (1.09%)                                         | ko00564           |
| Cutin, suberine and wax biosynthesis       | 95 (0.34%)                                       | 9 (0.36%)                                          | ko00073           |
| Synthesis and degradation of ketone bodies | 18 (0.06%)                                       | 1 (0.04%)                                          | ko00072           |

**Table S5.** All proteins identified in developing *P. ostii* seeds.

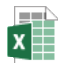

Table S5.xlsx

**Table S6.** Pathway-based categories of proteins in *P. ostii* seeds.

|    | <b>Pathway</b>                              | <b>Count (2475)</b> | <b>Pathway ID</b> |
|----|---------------------------------------------|---------------------|-------------------|
| 1  | Metabolic pathways                          | 821                 | ko01100           |
| 2  | Biosynthesis of secondary metabolites       | 483                 | ko01110           |
| 3  | Carbon metabolism                           | 174                 | ko01200           |
| 4  | Biosynthesis of amino acids                 | 148                 | ko01230           |
| 5  | Protein processing in endoplasmic reticulum | 134                 | ko04141           |
| 6  | Ribosome                                    | 115                 | ko03010           |
| 7  | Glycolysis / Gluconeogenesis                | 93                  | ko00010           |
| 8  | Amino sugar and nucleotide sugar metabolism | 77                  | ko00520           |
| 9  | Endocytosis                                 | 76                  | ko04144           |
| 10 | Starch and sucrose metabolism               | 75                  | ko00500           |
| 11 | RNA transport                               | 75                  | ko03013           |
| 12 | Pyruvate metabolism                         | 64                  | ko00620           |
| 13 | Oxidative phosphorylation                   | 55                  | ko00190           |
| 14 | Purine metabolism                           | 54                  | ko00230           |
| 15 | Spliceosome                                 | 54                  | ko03040           |
| 16 | Peroxisome                                  | 52                  | ko04146           |
| 17 | Carbon fixation in photosynthetic organisms | 49                  | ko00710           |
| 18 | Glutathione metabolism                      | 48                  | ko00480           |
| 19 | Citrate cycle (TCA cycle)                   | 47                  | ko00020           |
| 20 | Cysteine and methionine metabolism          | 46                  | ko00270           |
| 21 | 2-Oxocarboxylic acid metabolism             | 44                  | ko01210           |
| 22 | Phenylpropanoid biosynthesis                | 43                  | ko00940           |
| 23 | Pyrimidine metabolism                       | 42                  | ko00240           |
| 24 | Ubiquitin mediated proteolysis              | 42                  | ko04120           |
| 25 | Proteasome                                  | 41                  | ko03050           |
| 26 | RNA degradation                             | 41                  | ko03018           |
| 27 | Glyoxylate and dicarboxylate metabolism     | 40                  | ko00630           |
| 28 | Plant-pathogen interaction                  | 38                  | ko04626           |
| 29 | Pentose phosphate pathway                   | 37                  | ko00030           |
| 30 | Phagosome                                   | 36                  | ko04145           |
| 31 | Galactose metabolism                        | 35                  | ko00052           |
| 32 | Fatty acid metabolism                       | 35                  | ko01212           |
| 33 | Fructose and mannose metabolism             | 34                  | ko00051           |
| 34 | mRNA surveillance pathway                   | 33                  | ko03015           |
| 35 | Tyrosine metabolism                         | 33                  | ko00350           |
| 36 | Aminoacyl-tRNA biosynthesis                 | 32                  | ko00970           |
| 37 | Fatty acid degradation                      | 31                  | ko00071           |
| 38 | Ascorbate and aldarate metabolism           | 31                  | ko00053           |

---

|    |                                                        |    |         |
|----|--------------------------------------------------------|----|---------|
| 39 | MAPK signaling pathway - plant                         | 30 | ko04016 |
| 40 | Glycine, serine and threonine metabolism               | 30 | ko00260 |
| 41 | Alanine, aspartate and glutamate metabolism            | 29 | ko00250 |
| 42 | Glycerophospholipid metabolism                         | 27 | ko00564 |
| 43 | Pentose and glucuronate interconversions               | 27 | ko00040 |
| 44 | Arginine and proline metabolism                        | 27 | ko00330 |
| 45 | Fatty acid biosynthesis                                | 26 | ko00061 |
| 46 | Inositol phosphate metabolism                          | 25 | ko00562 |
| 47 | Terpenoid backbone biosynthesis                        | 25 | ko00900 |
| 48 | Phenylalanine, tyrosine and tryptophan biosynthesis    | 25 | ko00400 |
| 49 | Valine, leucine and isoleucine degradation             | 24 | ko00280 |
| 50 | ALA metabolism                                         | 24 | ko00592 |
| 51 | Glycerolipid metabolism                                | 24 | ko00561 |
| 52 | Pantothenate and CoA biosynthesis                      | 23 | ko00770 |
| 53 | Phenylalanine metabolism                               | 23 | ko00360 |
| 54 | Flavonoid biosynthesis                                 | 22 | ko00941 |
| 55 | Propanoate metabolism                                  | 22 | ko00640 |
| 56 | Other glycan degradation                               | 22 | ko00511 |
| 57 | Cyanoamino acid metabolism                             | 22 | ko00460 |
| 58 | Protein export                                         | 21 | ko03060 |
| 59 | Ubiquinone and other terpenoid-quinone biosynthesis    | 21 | ko00130 |
| 60 | N-Glycan biosynthesis                                  | 20 | ko00510 |
| 61 | Arginine biosynthesis                                  | 20 | ko00220 |
| 62 | Tryptophan metabolism                                  | 20 | ko00380 |
| 63 | Phosphatidylinositol signaling system                  | 20 | ko04070 |
| 64 | Sphingolipid metabolism                                | 19 | ko00600 |
| 65 | Ribosome biogenesis in eukaryotes                      | 18 | ko03008 |
| 66 | beta-Alanine metabolism                                | 17 | ko00410 |
| 67 | Plant hormone signal transduction                      | 17 | ko04075 |
| 68 | Arachidonic acid metabolism                            | 17 | ko00590 |
| 69 | Valine, leucine and isoleucine biosynthesis            | 15 | ko00290 |
| 70 | Porphyrin and chlorophyll metabolism                   | 14 | ko00860 |
| 71 | Nucleotide excision repair                             | 14 | ko03420 |
| 72 | One carbon pool by folate                              | 14 | ko00670 |
| 73 | Vitamin B6 metabolism                                  | 14 | ko00750 |
| 74 | Tropane, piperidine and pyridine alkaloid biosynthesis | 13 | ko00960 |
| 75 | Glycosphingolipid biosynthesis - ganglio series        | 12 | ko00604 |
| 76 | Selenocompound metabolism                              | 12 | ko00450 |
| 77 | Glycosaminoglycan degradation                          | 12 | ko00531 |
| 78 | Butanoate metabolism                                   | 12 | ko00650 |

---

---

|     |                                                            |    |         |
|-----|------------------------------------------------------------|----|---------|
| 79  | SNARE interactions in vesicular transport                  | 12 | ko04130 |
| 80  | Linoleic acid metabolism                                   | 11 | ko00591 |
| 81  | UFA biosynthesis                                           | 11 | ko01040 |
| 82  | Isoquinoline alkaloid biosynthesis                         | 11 | ko00950 |
| 83  | Sulfur metabolism                                          | 11 | ko00920 |
| 84  | Nitrogen metabolism                                        | 11 | ko00910 |
| 85  | DNA replication                                            | 11 | ko03030 |
| 86  | ABC transporters                                           | 10 | ko02010 |
| 87  | Lysine degradation                                         | 10 | ko00310 |
| 88  | Ether lipid metabolism                                     | 10 | ko00565 |
| 89  | Thiamine metabolism                                        | 10 | ko00730 |
| 90  | Isoflavonoid biosynthesis                                  | 9  | ko00943 |
| 91  | Cutin, suberine and wax biosynthesis                       | 9  | ko00073 |
| 92  | Homologous recombination                                   | 9  | ko03440 |
| 93  | Mismatch repair                                            | 9  | ko03430 |
| 94  | Folate biosynthesis                                        | 9  | ko00790 |
| 95  | Nicotinate and nicotinamide metabolism                     | 9  | ko00760 |
| 96  | Biotin metabolism                                          | 9  | ko00780 |
| 97  | Histidine metabolism                                       | 8  | ko00340 |
| 98  | Steroid biosynthesis                                       | 8  | ko00100 |
| 99  | Glycosphingolipid biosynthesis - globo and isoglobo series | 8  | ko00603 |
| 100 | RNA polymerase                                             | 8  | ko03020 |
| 101 | Stilbenoid, diarylheptanoid and gingerol biosynthesis      | 7  | ko00945 |
| 102 | Lysine biosynthesis                                        | 7  | ko00300 |
| 103 | Riboflavin metabolism                                      | 7  | ko00740 |
| 104 | Fatty acid elongation                                      | 7  | ko00062 |
| 105 | Other types of O-glycan biosynthesis                       | 7  | ko00514 |
| 106 | Taurine and hypotaurine metabolism                         | 6  | ko00430 |
| 107 | C5-Branched dibasic acid metabolism                        | 6  | ko00660 |
| 108 | Limonene and pinene degradation                            | 5  | ko00903 |
| 109 | Base excision repair                                       | 5  | ko03410 |
| 110 | Circadian rhythm - plant                                   | 5  | ko04712 |
| 111 | Photosynthesis                                             | 5  | ko00195 |
| 112 | Anthocyanin biosynthesis                                   | 5  | ko00942 |
| 113 | Carotenoid biosynthesis                                    | 5  | ko00906 |
| 114 | Indole alkaloid biosynthesis                               | 5  | ko00901 |
| 115 | Basal transcription factors                                | 3  | ko03022 |
| 116 | Monobactam biosynthesis                                    | 3  | ko00261 |
| 117 | Brassinosteroid biosynthesis                               | 3  | ko00905 |
| 118 | Glycosylphosphatidylinositol (GPI)-anchor biosynthesis     | 3  | ko00563 |

---

|     |                                                      |   |         |
|-----|------------------------------------------------------|---|---------|
| 119 | Flavone and flavonol biosynthesis                    | 3 | ko00944 |
| 120 | Sulfur relay system                                  | 2 | ko04122 |
| 121 | Sesquiterpenoid and triterpenoid biosynthesis        | 2 | ko00909 |
| 122 | Monoterpenoid biosynthesis                           | 2 | ko00902 |
| 123 | Benzoxazinoid biosynthesis                           | 2 | ko00402 |
| 124 | Zeatin biosynthesis                                  | 1 | ko00908 |
| 125 | Photosynthesis - antenna proteins                    | 1 | ko00196 |
| 126 | AGE-RAGE signaling pathway in diabetic complications | 1 | ko04933 |
| 127 | Caffeine metabolism                                  | 1 | ko00232 |
| 128 | Phosphonate and phosphinate metabolism               | 1 | ko00440 |
| 129 | Glucosinolate biosynthesis                           | 1 | ko00966 |
| 130 | Non-homologous end-joining                           | 1 | ko03450 |
| 131 | Synthesis and degradation of ketone bodies           | 1 | ko00072 |
| 132 | Vancomycin resistance                                | 1 | ko01502 |

**Table S7.** Differential expressed correlations at different time points

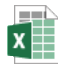

Table S7.xlsx



**Figure S1.** Number of identified unigenes in each *P. ostii* seeds sample.

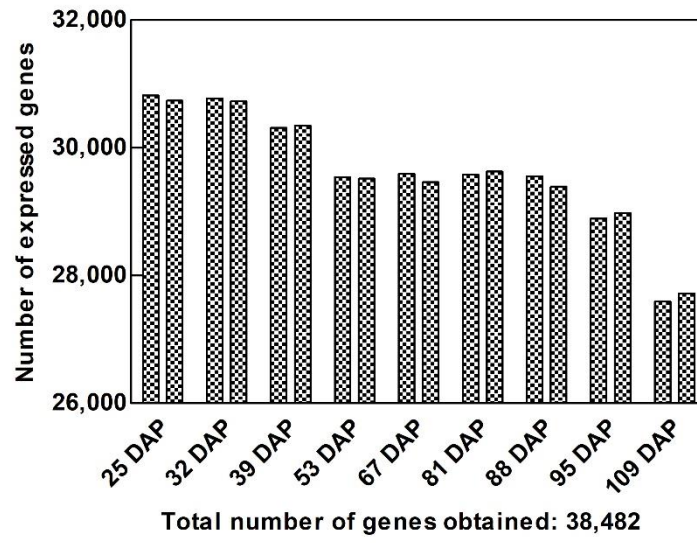

**Figure S2.** GO functional classification of *P. ostii* DEGs for the eight comparisons.

32 DAP-vs- 25 DAP

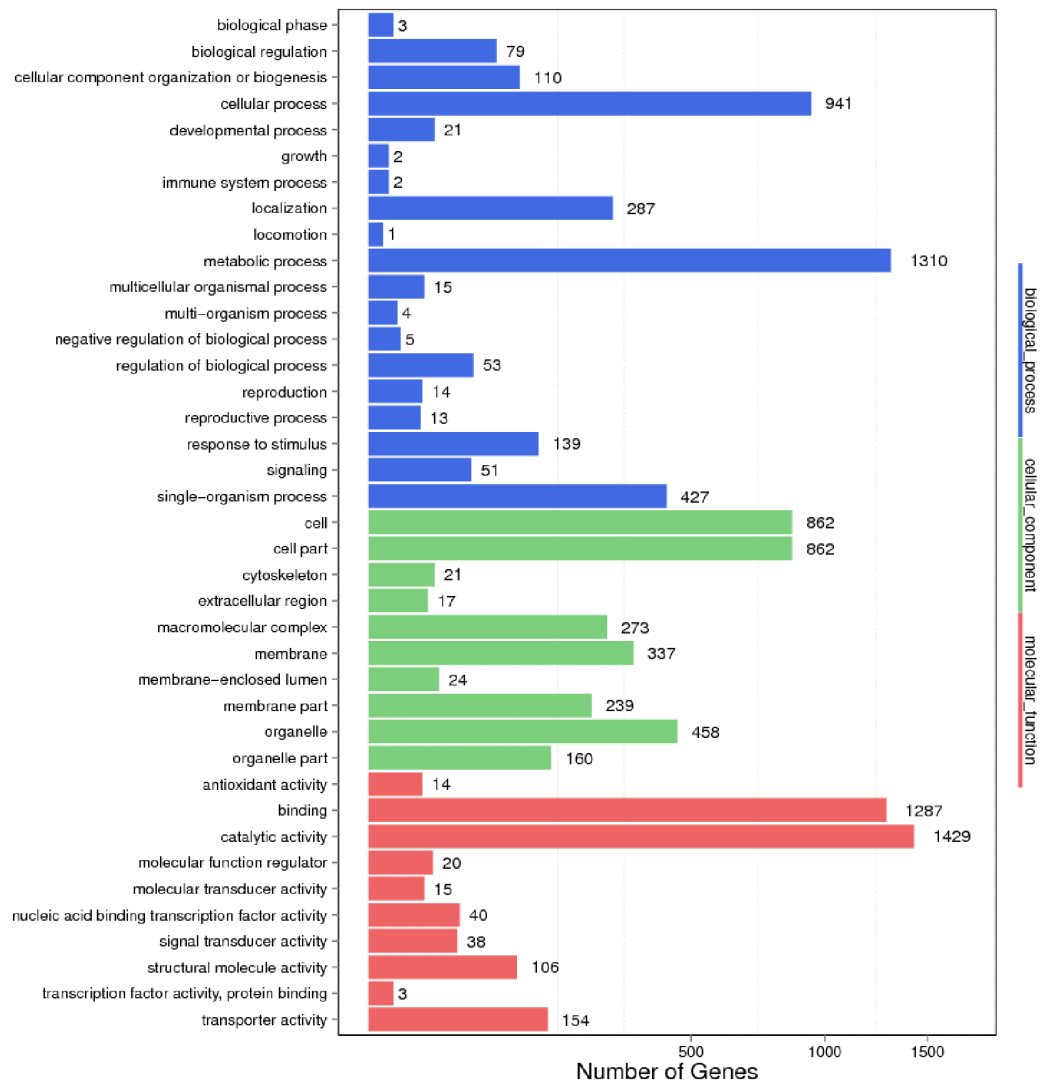

### 39 DAP-vs- 25 DAP

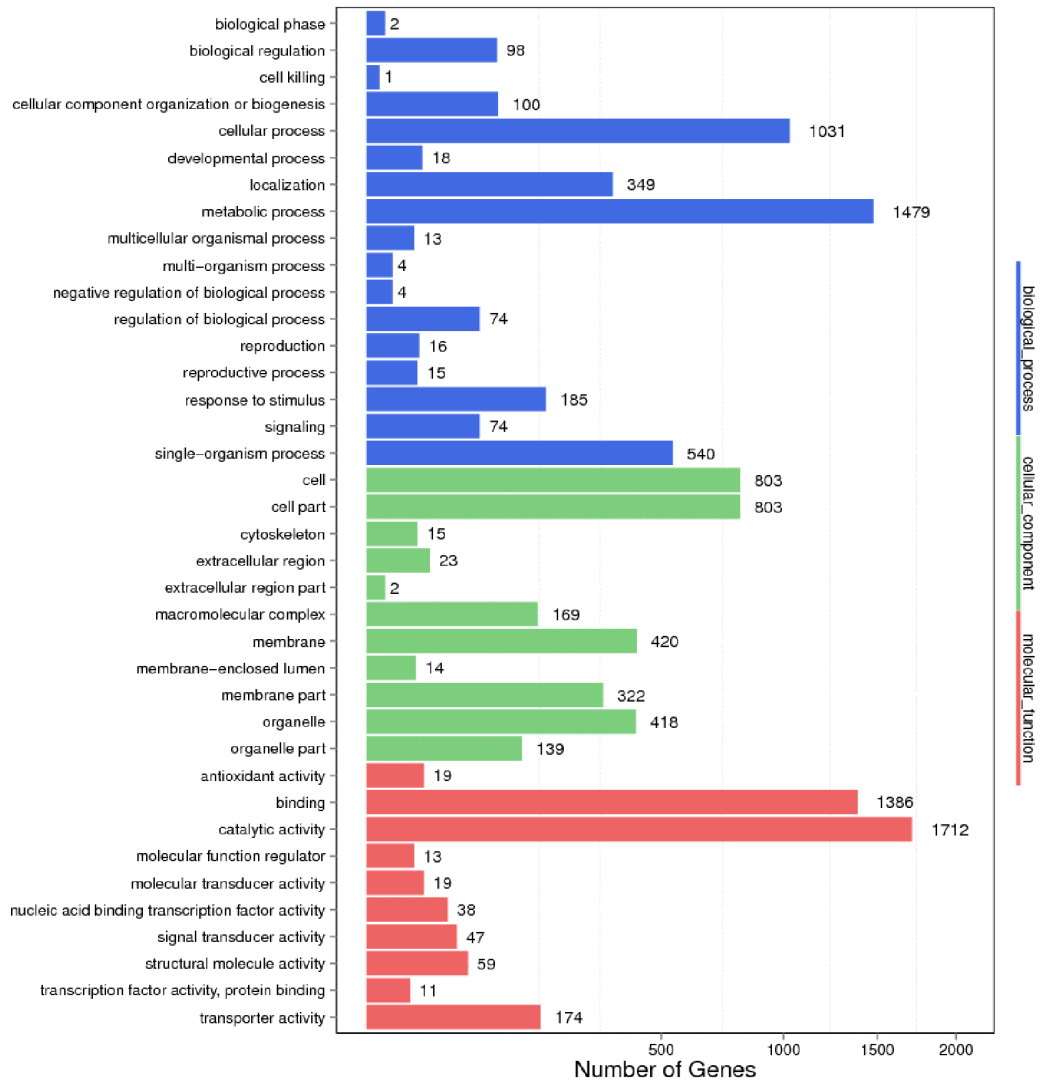

## 53 DAP-vs- 25 DAP

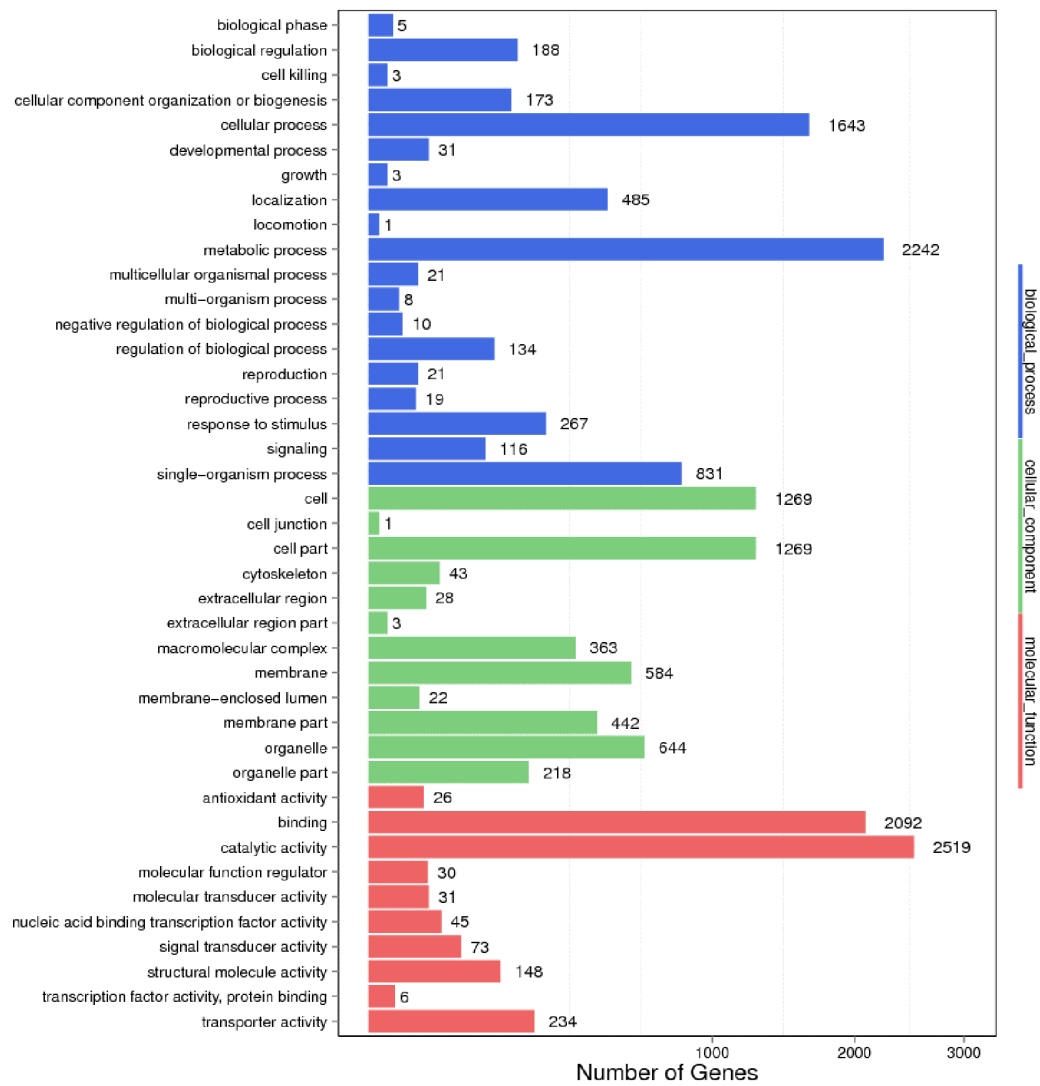

## 67 DAP-vs- 25 DAP

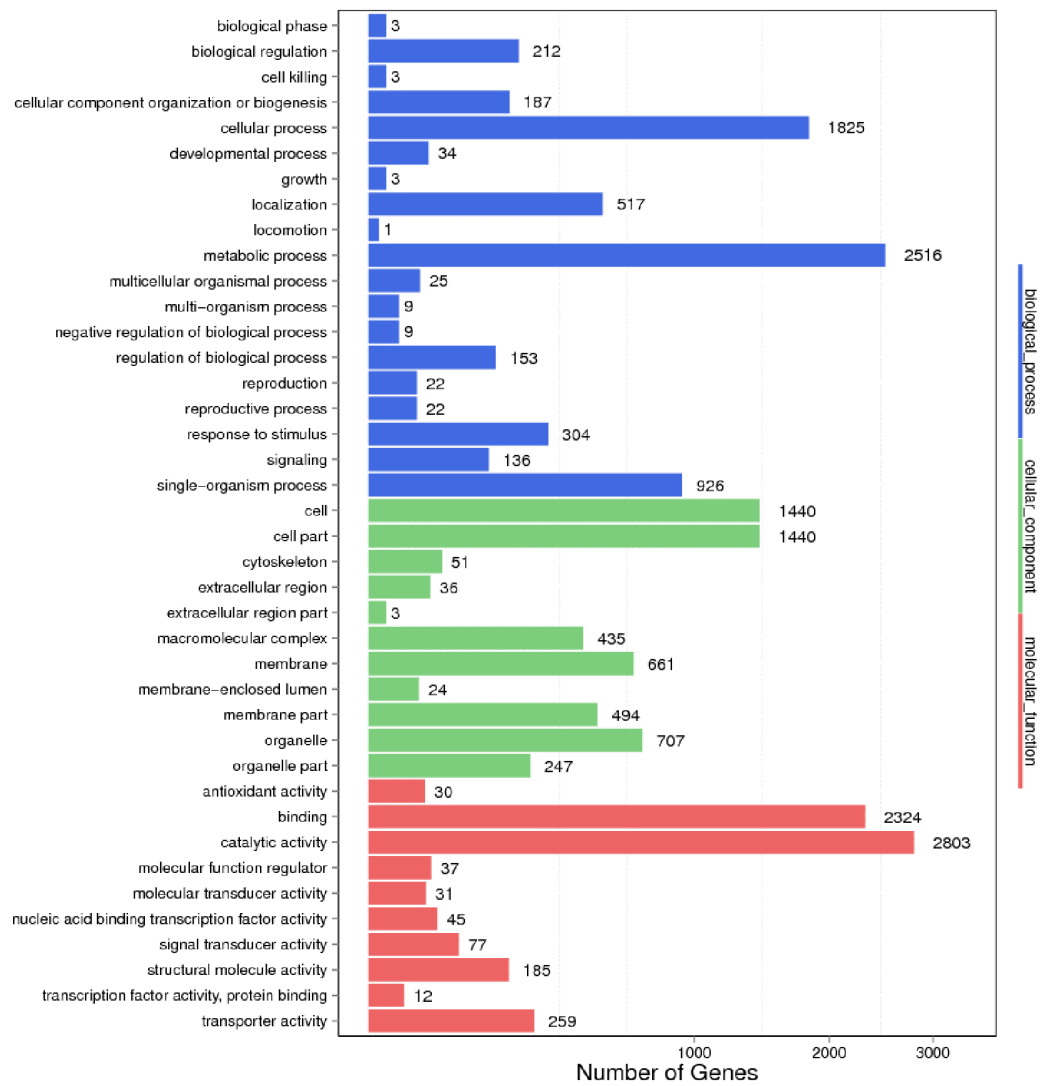

# 81 DAP-vs- 25 DAP

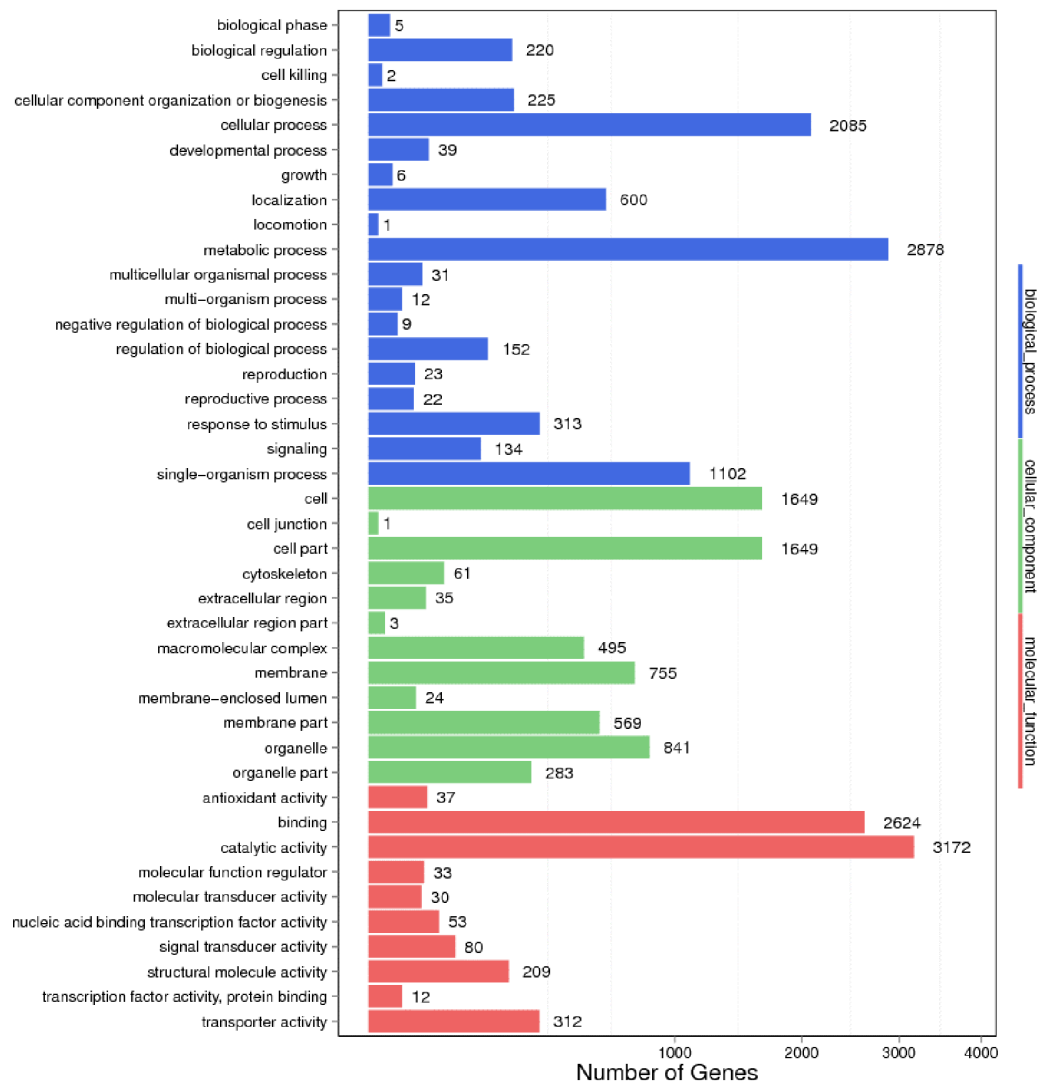

## 88 DAP-vs- 25 DAP

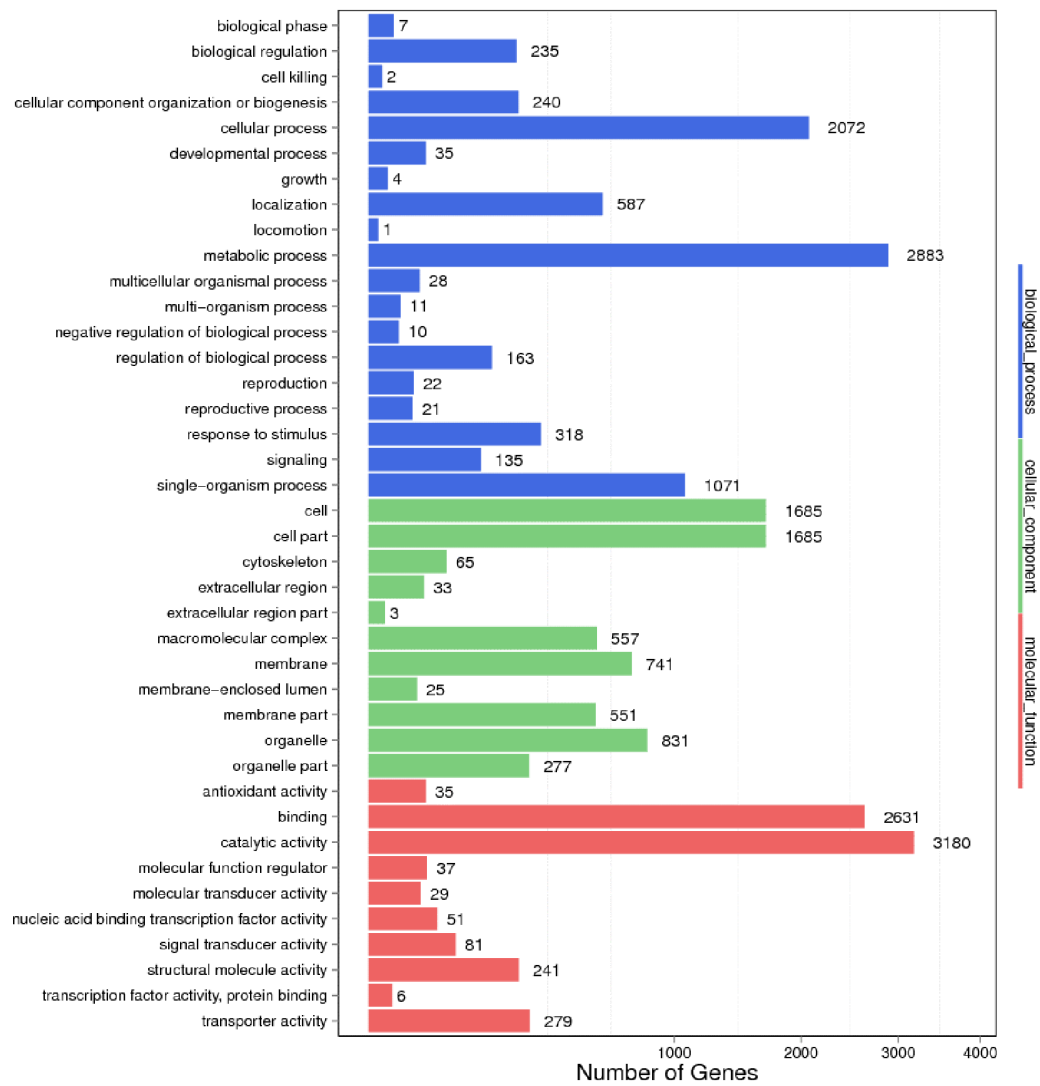

# 95 DAP-vs- 25 DAP

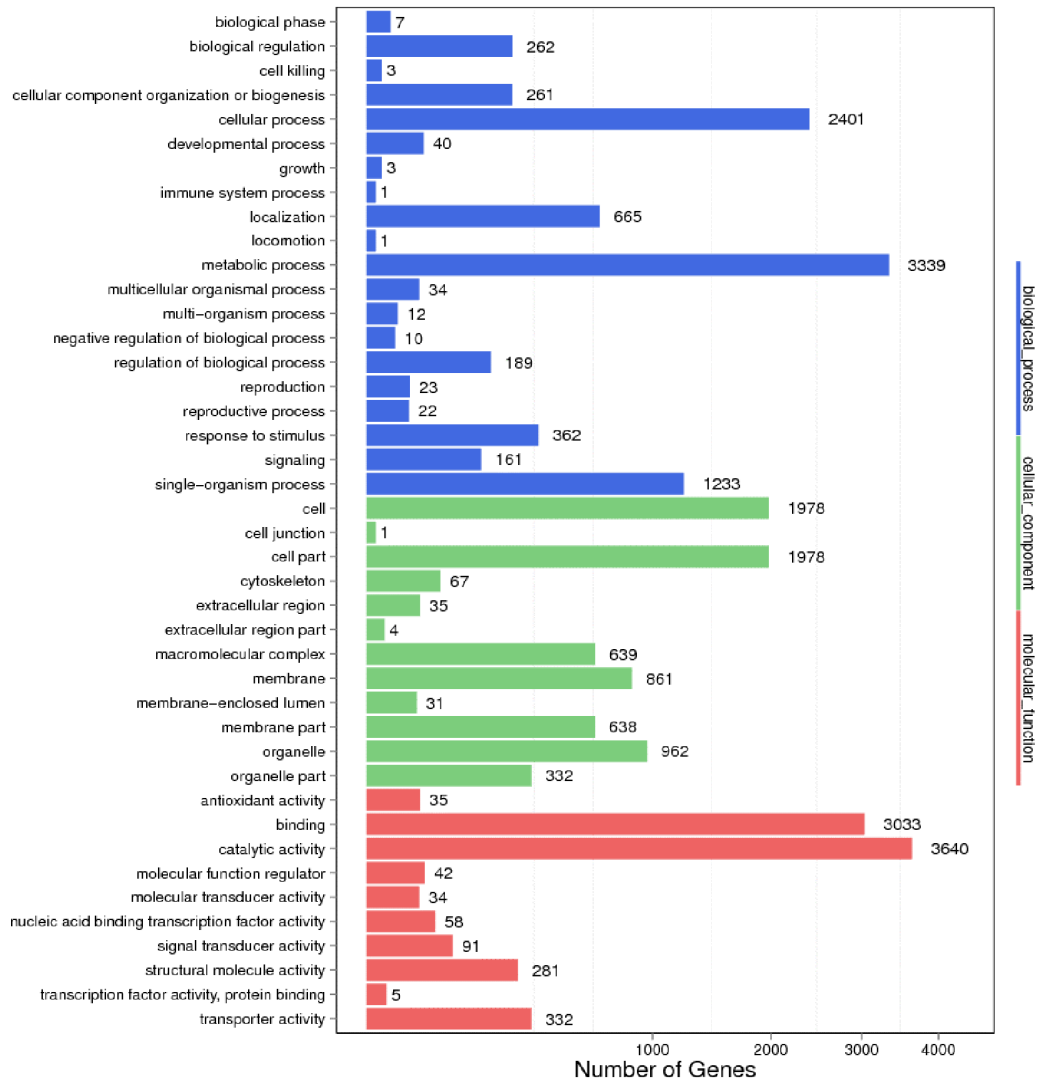



# 109 DAP-vs- 25 DAP

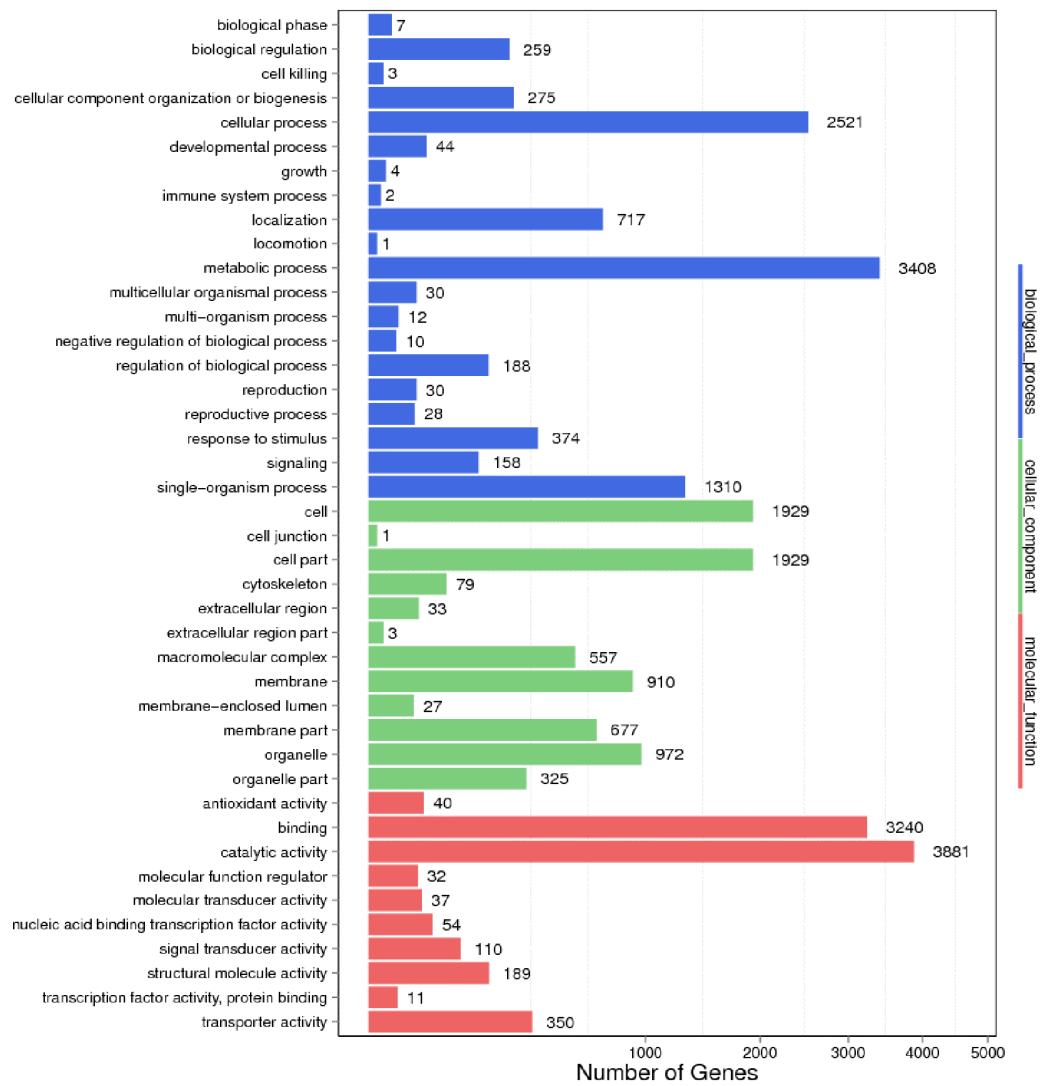

**Figure S3.** KEGG function classification of DEGs for each comparison.

32 DAP-vs- 25 DAP

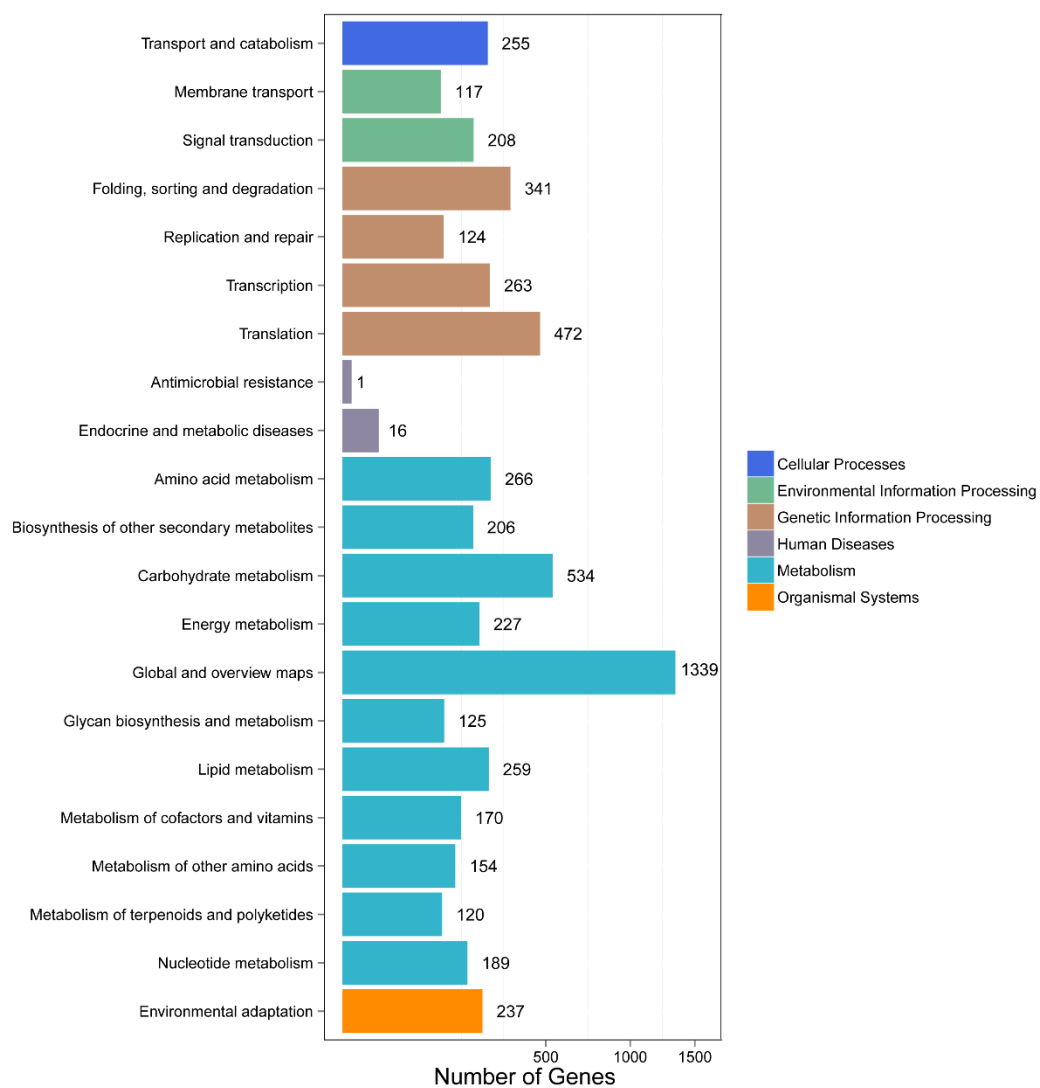

## 39 DAP-vs- 25 DAP

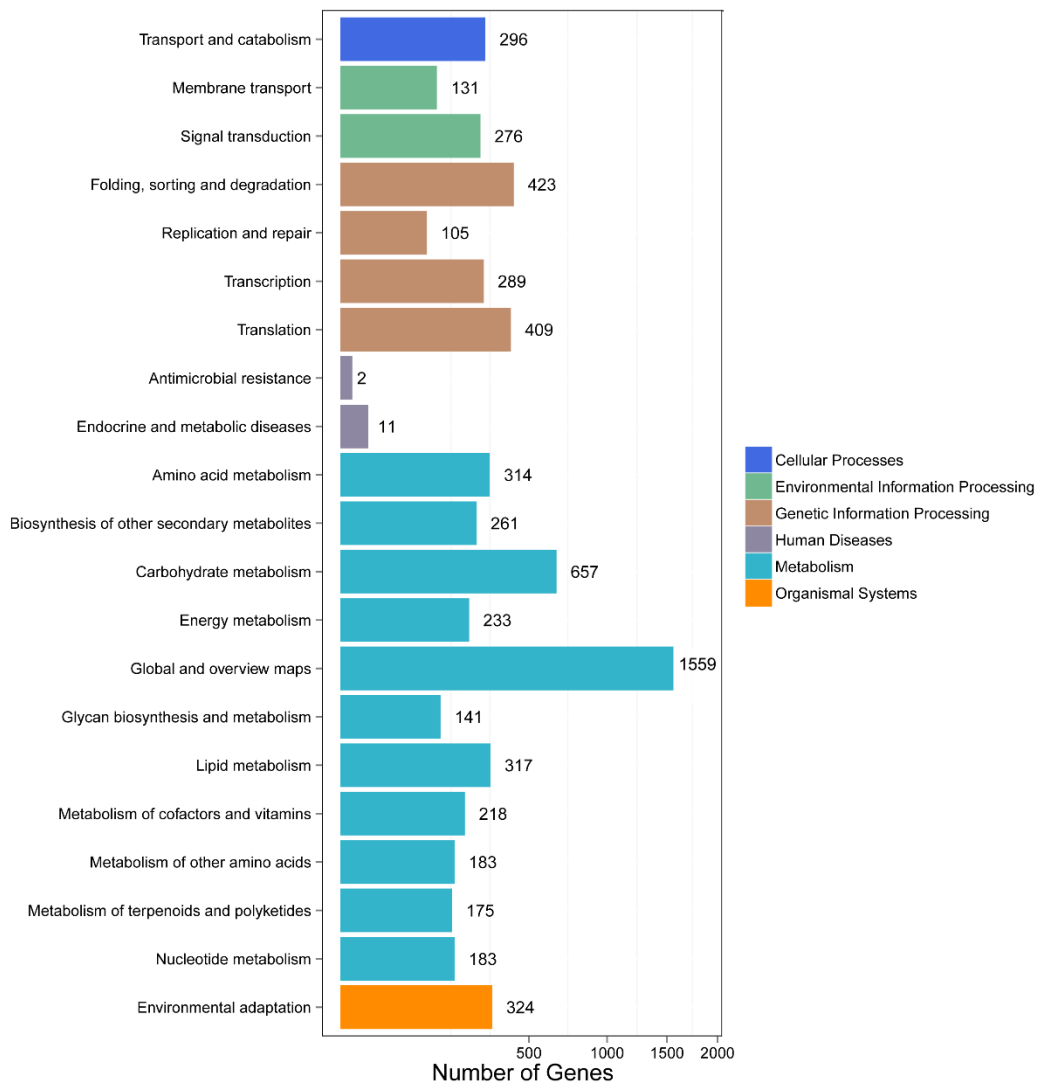

## 53 DAP-vs- 25 DAP

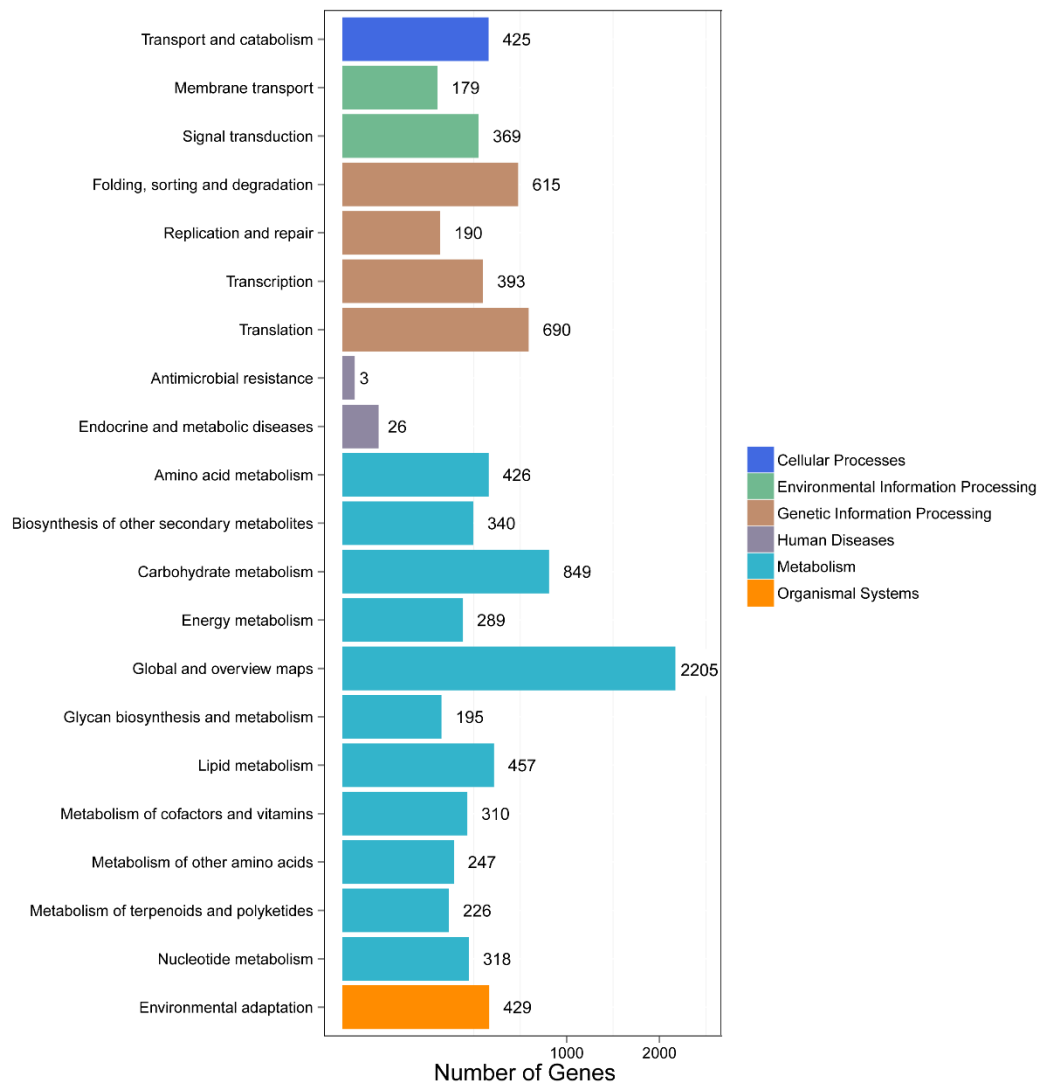

## 67 DAP-vs- 25 DAP

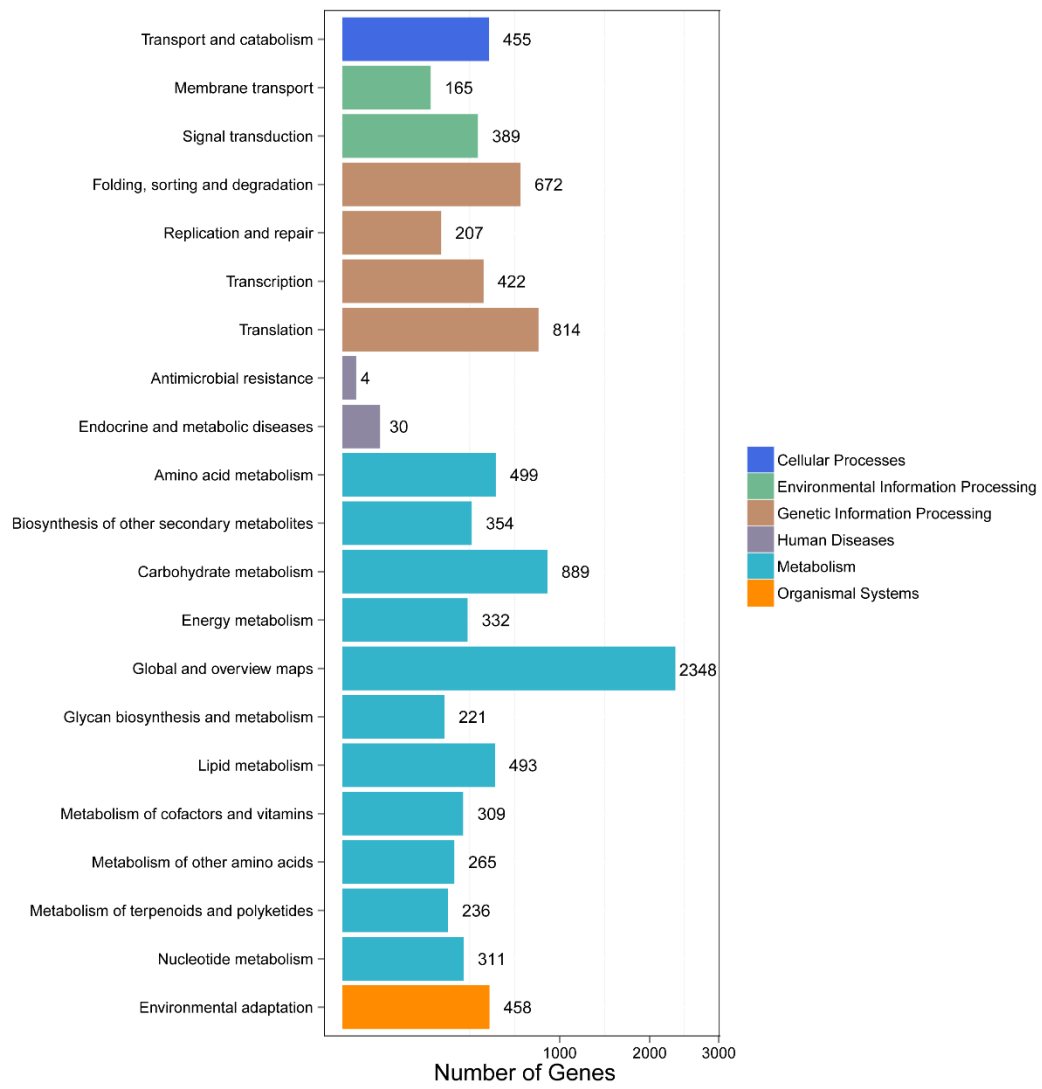

## 81 DAP-vs- 25 DAP

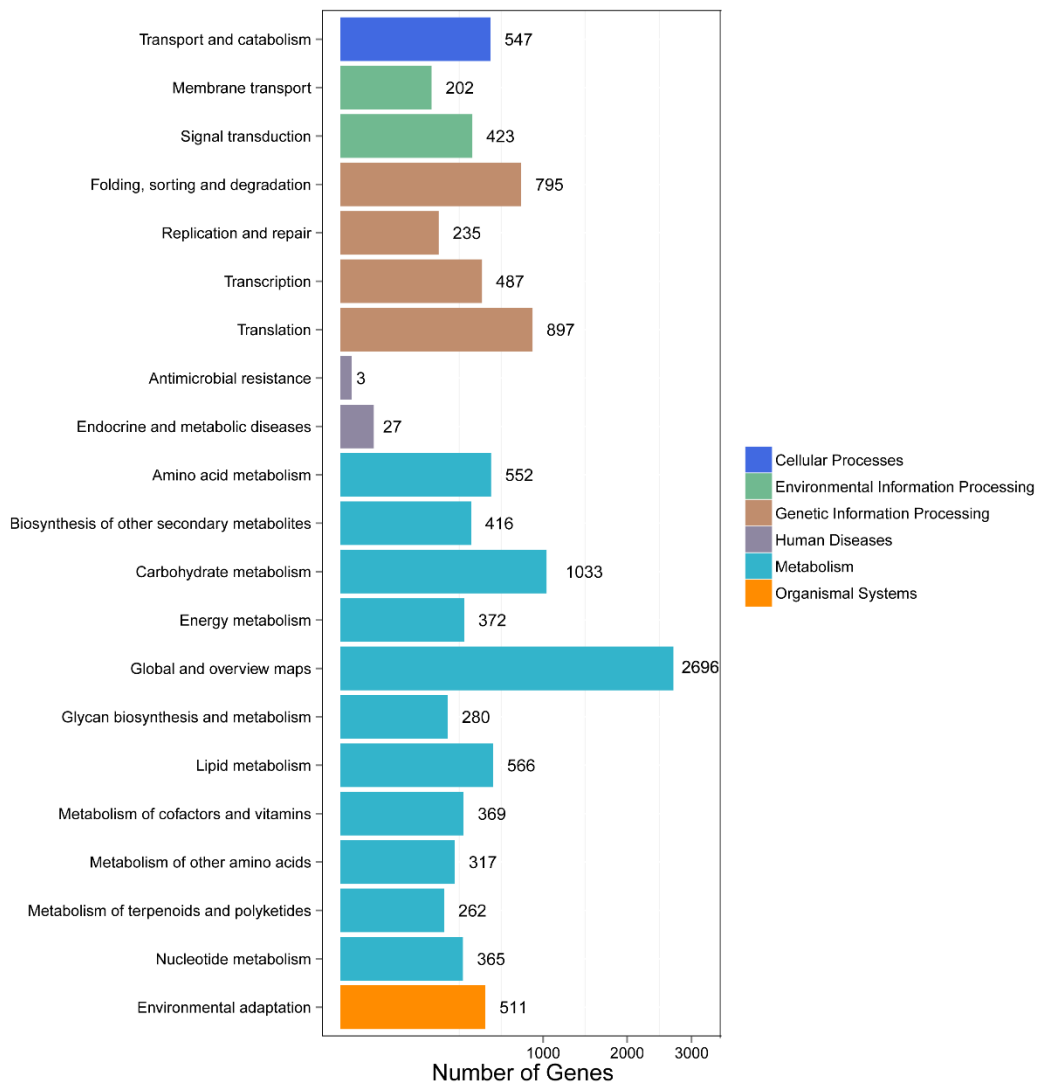

## 88 DAP-vs- 25 DAP

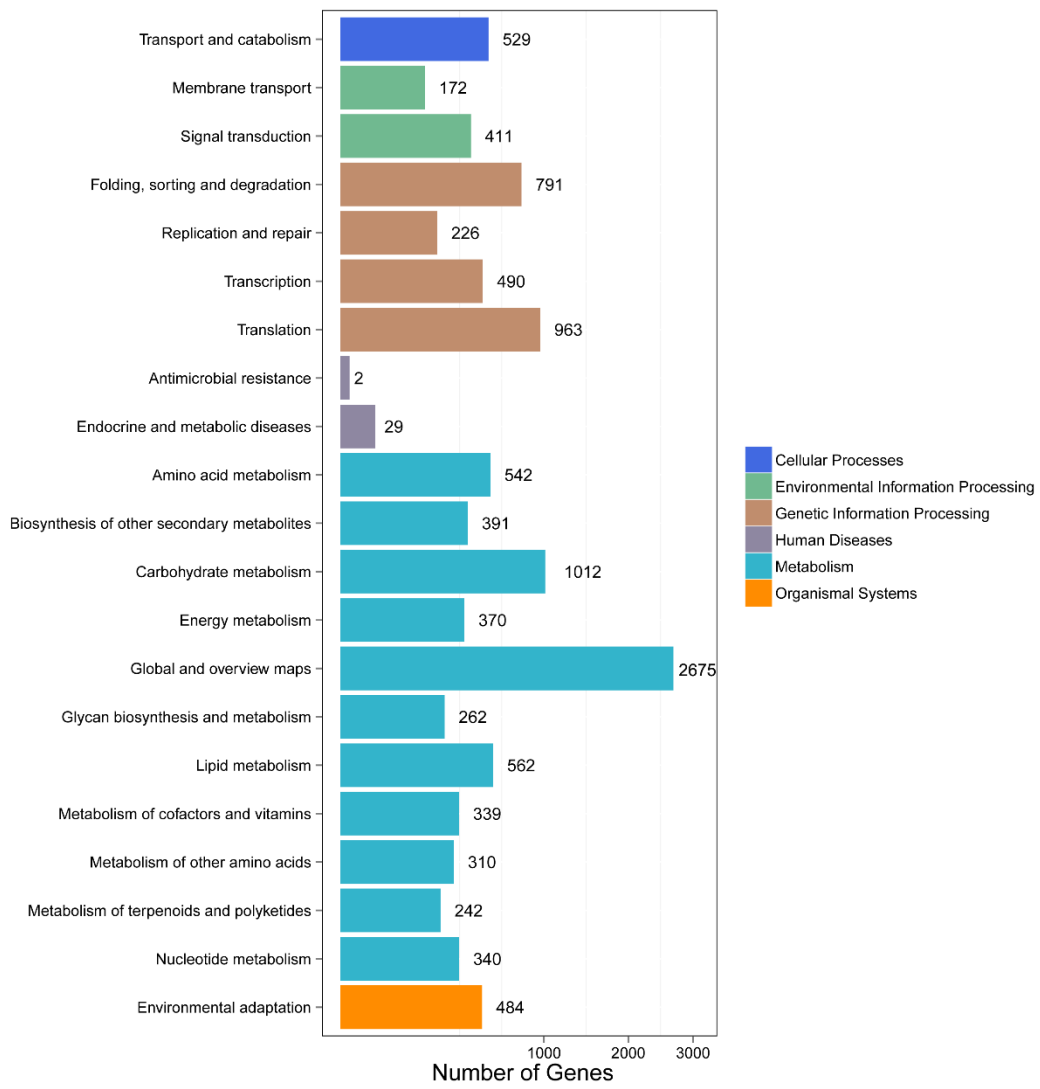

## 95 DAP-vs- 25 DAP

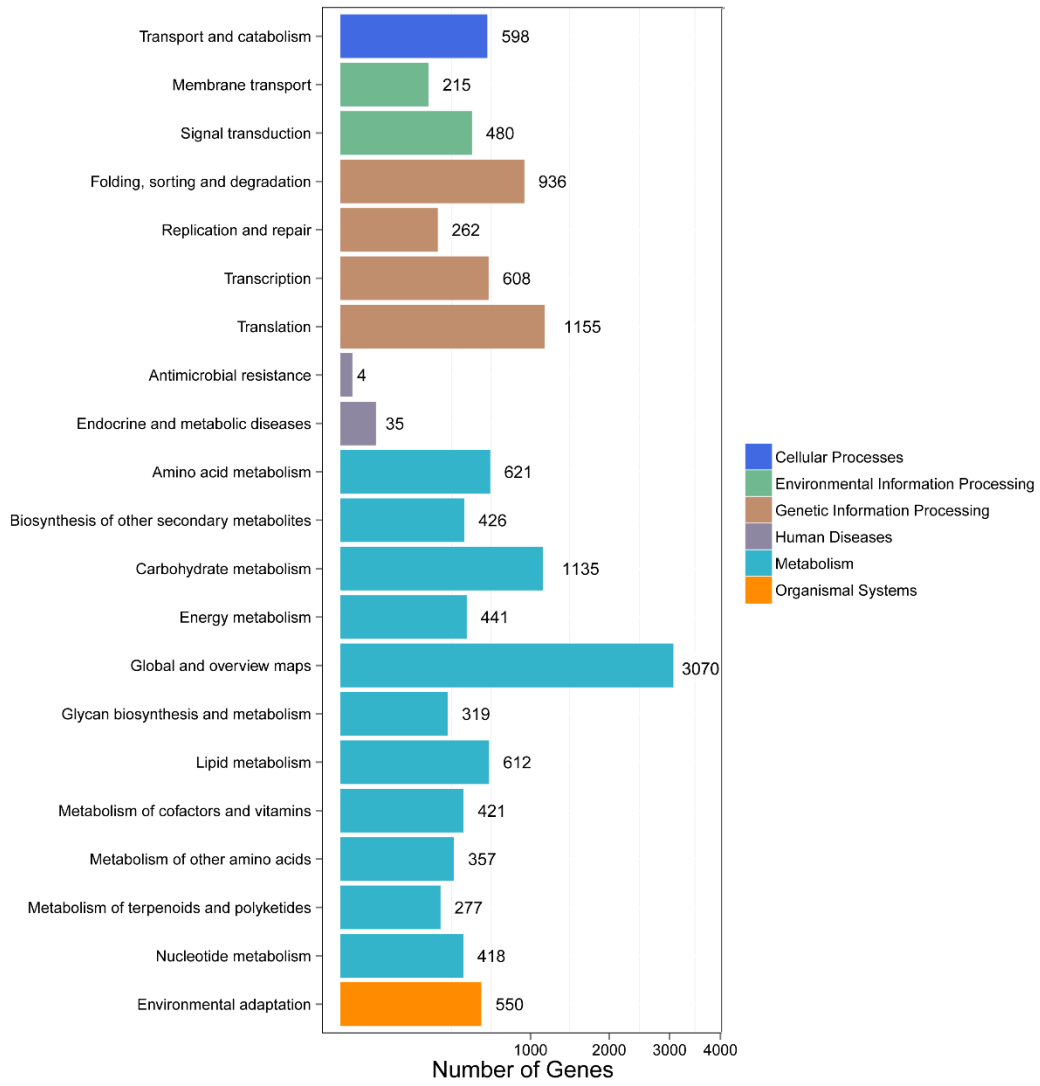



# 109 DAP-vs- 25 DAP

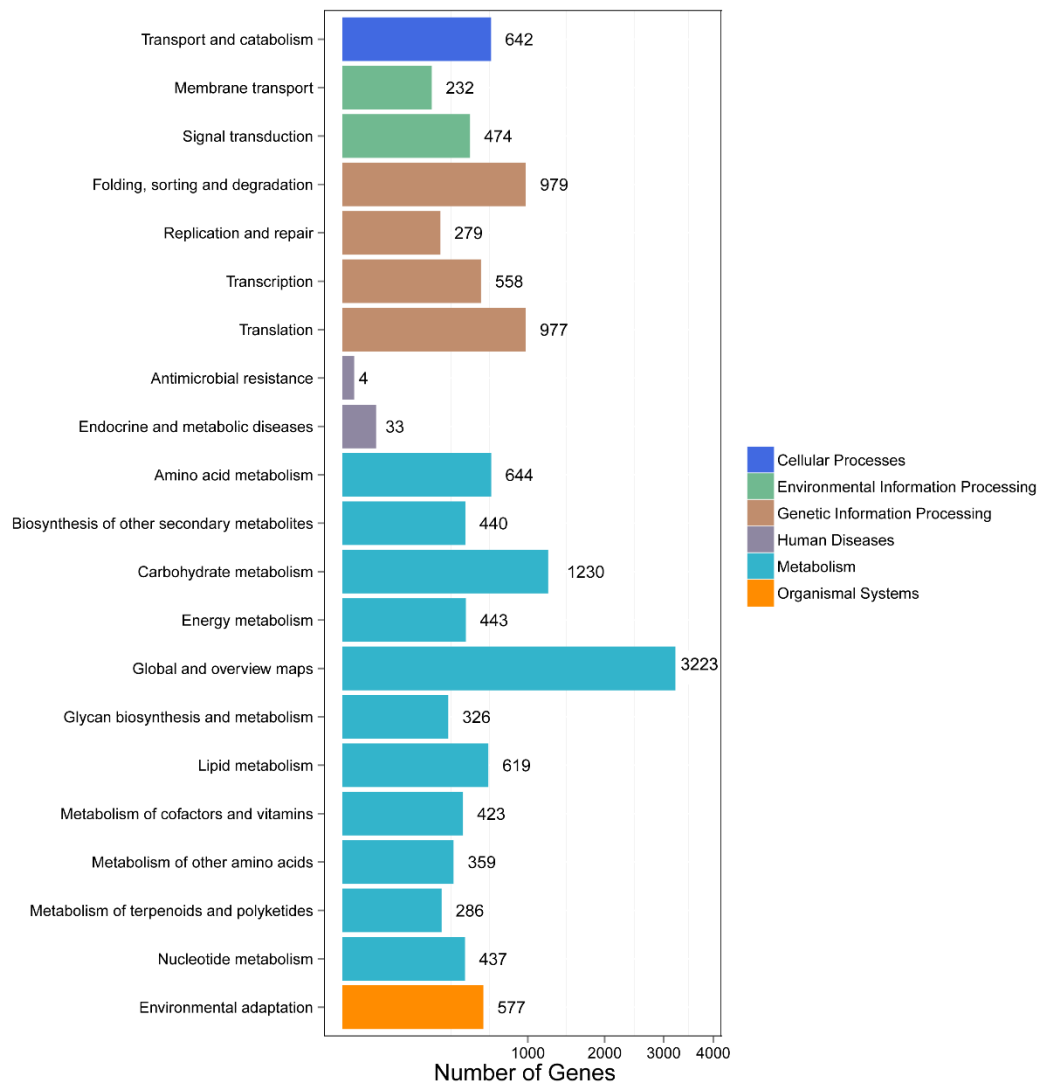

**Figure S4.** Functional classification of GO annotated proteins in *P. ostii* seeds.

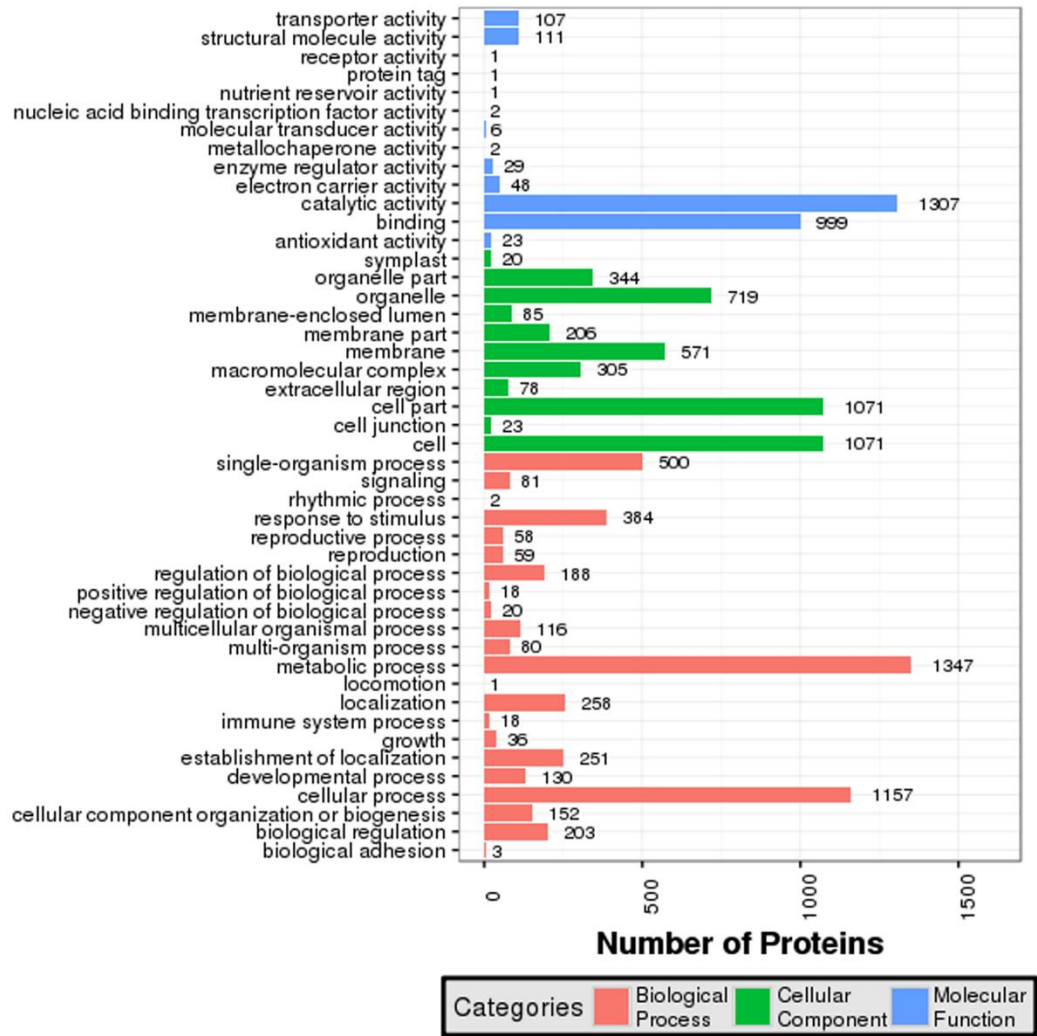

**Figure S5.** Cluster analysis of correlated DEGs and DEPs at different developmental time points. Each row in the figure represents a DEP/DEG, with its ID and differential expression multiple on the right. Red represents up-regulated expression and green represents down-regulated expression.

32 DAP-vs- 25 DAP

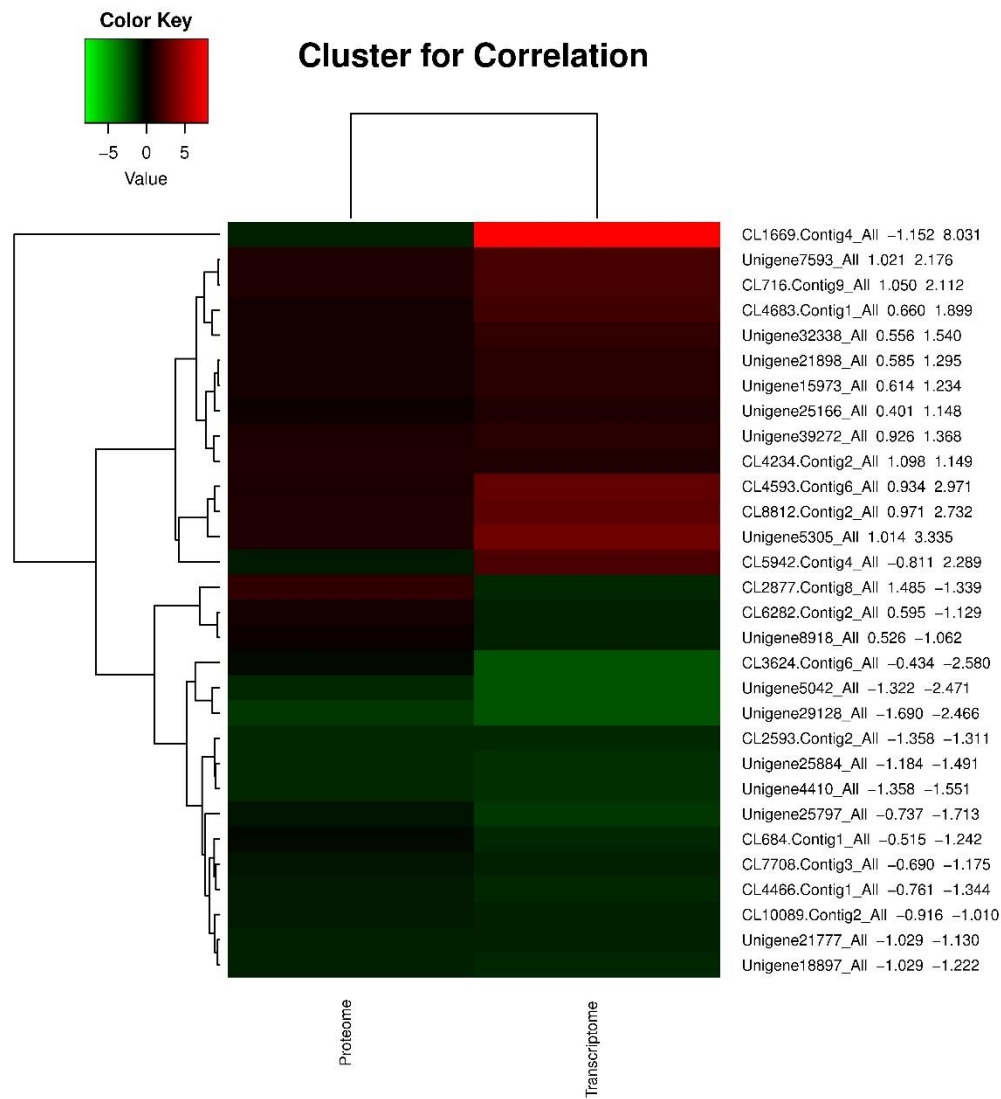

# 39 DAP-vs- 25 DAP

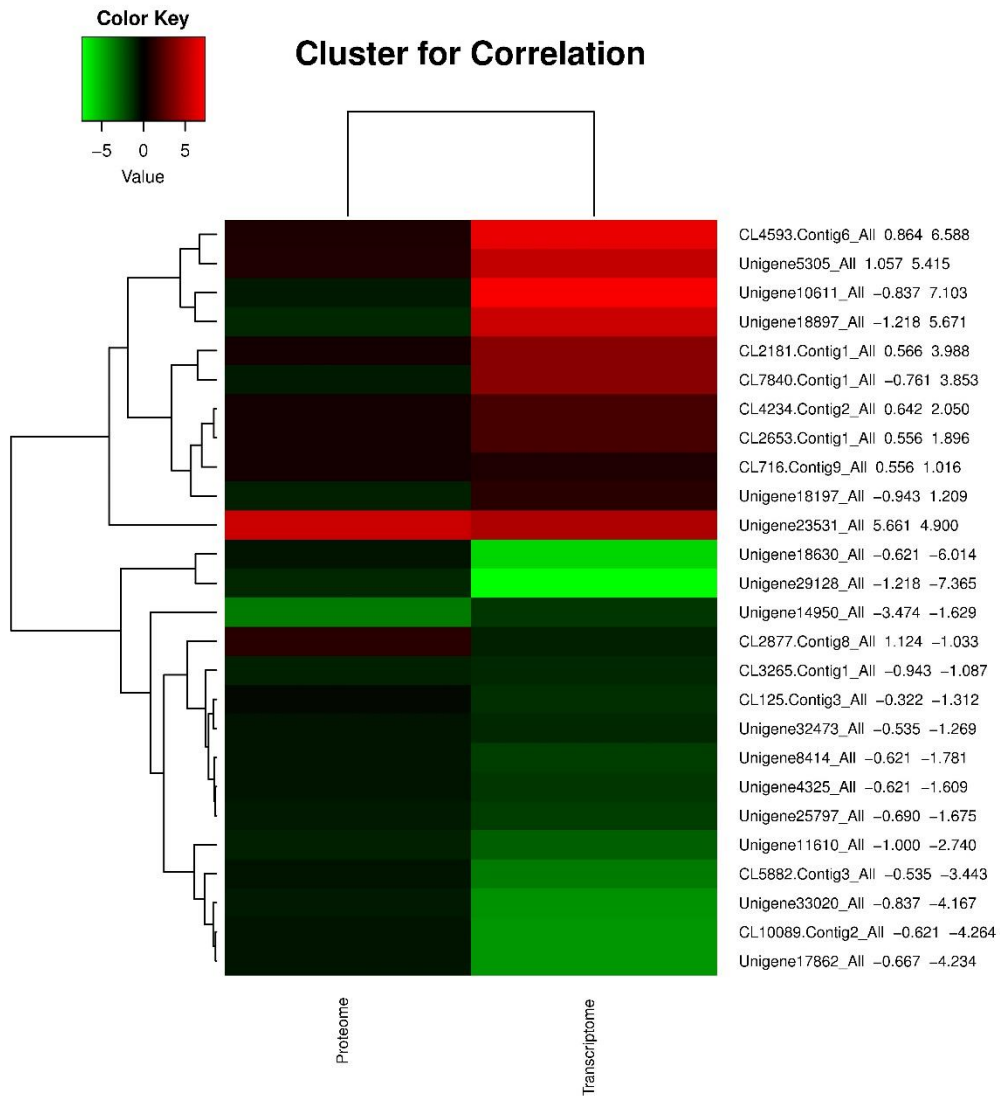

# 53 DAP-vs- 25 DAP

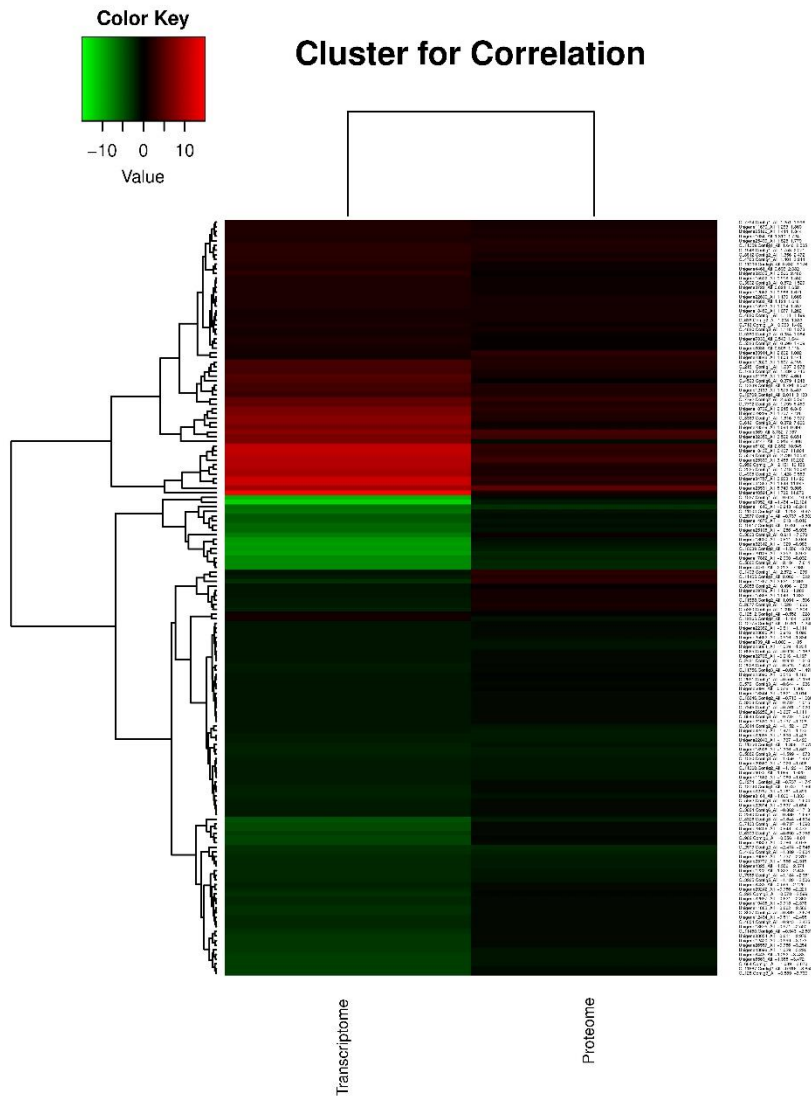



# 81 DAP-vs- 25 DAP

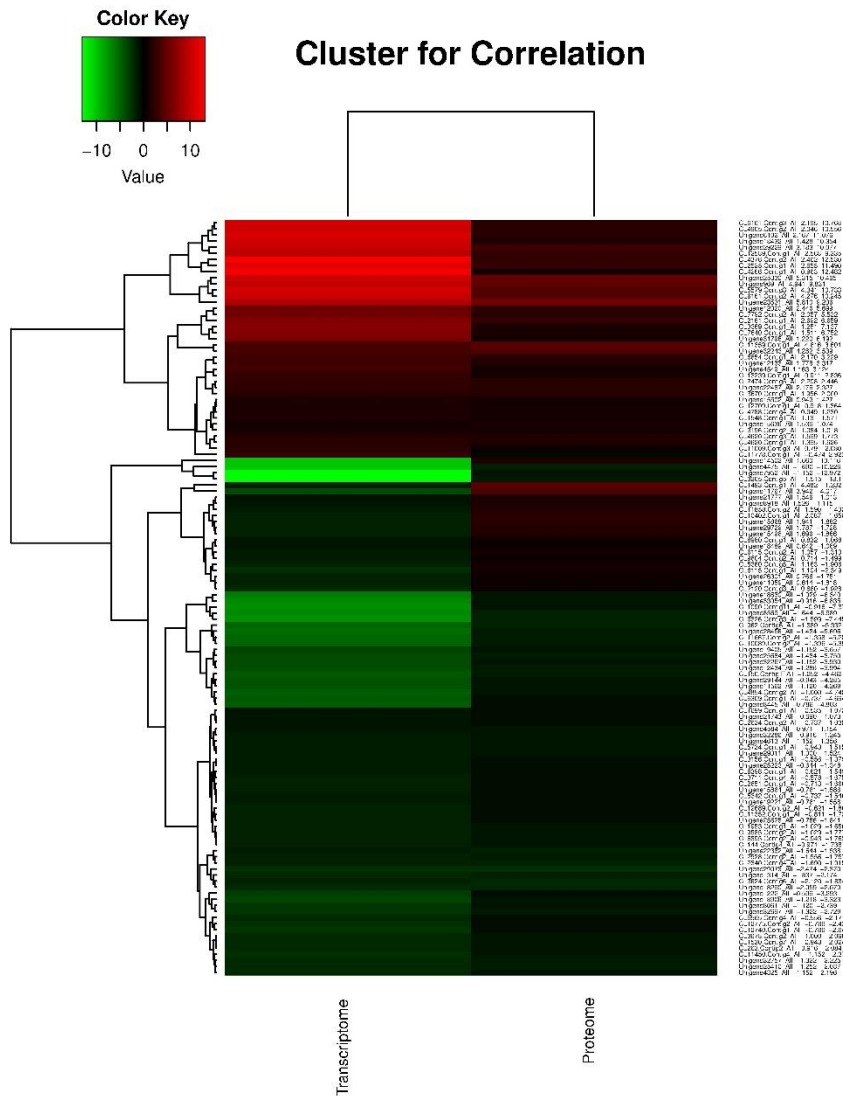

C.11E\_Cornel A 210 15.00  
 C.11E\_Cornel A 220 15.00  
 C.11E\_Cornel A 230 15.00  
 C.11E\_Cornel A 240 15.00  
 C.11E\_Cornel A 250 15.00  
 C.11E\_Cornel A 260 15.00  
 C.11E\_Cornel A 270 15.00  
 C.11E\_Cornel A 280 15.00  
 C.11E\_Cornel A 290 15.00  
 C.11E\_Cornel A 300 15.00  
 C.11E\_Cornel A 310 15.00  
 C.11E\_Cornel A 320 15.00  
 C.11E\_Cornel A 330 15.00  
 C.11E\_Cornel A 340 15.00  
 C.11E\_Cornel A 350 15.00  
 C.11E\_Cornel A 360 15.00  
 C.11E\_Cornel A 370 15.00  
 C.11E\_Cornel A 380 15.00  
 C.11E\_Cornel A 390 15.00  
 C.11E\_Cornel A 400 15.00  
 C.11E\_Cornel A 410 15.00  
 C.11E\_Cornel A 420 15.00  
 C.11E\_Cornel A 430 15.00  
 C.11E\_Cornel A 440 15.00  
 C.11E\_Cornel A 450 15.00  
 C.11E\_Cornel A 460 15.00  
 C.11E\_Cornel A 470 15.00  
 C.11E\_Cornel A 480 15.00  
 C.11E\_Cornel A 490 15.00  
 C.11E\_Cornel A 500 15.00  
 C.11E\_Cornel A 510 15.00  
 C.11E\_Cornel A 520 15.00  
 C.11E\_Cornel A 530 15.00  
 C.11E\_Cornel A 540 15.00  
 C.11E\_Cornel A 550 15.00  
 C.11E\_Cornel A 560 15.00  
 C.11E\_Cornel A 570 15.00  
 C.11E\_Cornel A 580 15.00  
 C.11E\_Cornel A 590 15.00  
 C.11E\_Cornel A 600 15.00  
 C.11E\_Cornel A 610 15.00  
 C.11E\_Cornel A 620 15.00  
 C.11E\_Cornel A 630 15.00  
 C.11E\_Cornel A 640 15.00  
 C.11E\_Cornel A 650 15.00  
 C.11E\_Cornel A 660 15.00  
 C.11E\_Cornel A 670 15.00  
 C.11E\_Cornel A 680 15.00  
 C.11E\_Cornel A 690 15.00  
 C.11E\_Cornel A 700 15.00  
 C.11E\_Cornel A 710 15.00  
 C.11E\_Cornel A 720 15.00  
 C.11E\_Cornel A 730 15.00  
 C.11E\_Cornel A 740 15.00  
 C.11E\_Cornel A 750 15.00  
 C.11E\_Cornel A 760 15.00  
 C.11E\_Cornel A 770 15.00  
 C.11E\_Cornel A 780 15.00  
 C.11E\_Cornel A 790 15.00  
 C.11E\_Cornel A 800 15.00  
 C.11E\_Cornel A 810 15.00  
 C.11E\_Cornel A 820 15.00  
 C.11E\_Cornel A 830 15.00  
 C.11E\_Cornel A 840 15.00  
 C.11E\_Cornel A 850 15.00  
 C.11E\_Cornel A 860 15.00  
 C.11E\_Cornel A 870 15.00  
 C.11E\_Cornel A 880 15.00  
 C.11E\_Cornel A 890 15.00  
 C.11E\_Cornel A 900 15.00  
 C.11E\_Cornel A 910 15.00  
 C.11E\_Cornel A 920 15.00  
 C.11E\_Cornel A 930 15.00  
 C.11E\_Cornel A 940 15.00  
 C.11E\_Cornel A 950 15.00  
 C.11E\_Cornel A 960 15.00  
 C.11E\_Cornel A 970 15.00  
 C.11E\_Cornel A 980 15.00  
 C.11E\_Cornel A 990 15.00  
 C.11E\_Cornel A 1000 15.00

# 88 DAP-vs- 25 DAP

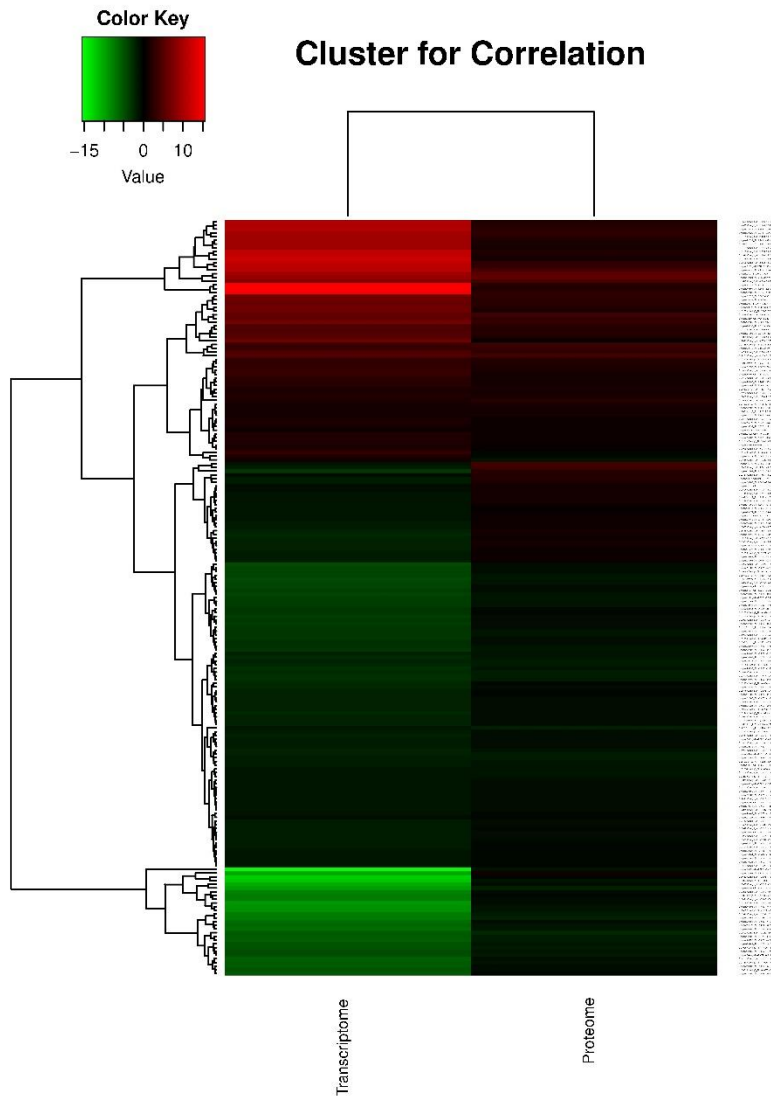



95 DAP-vs- 25 DAP

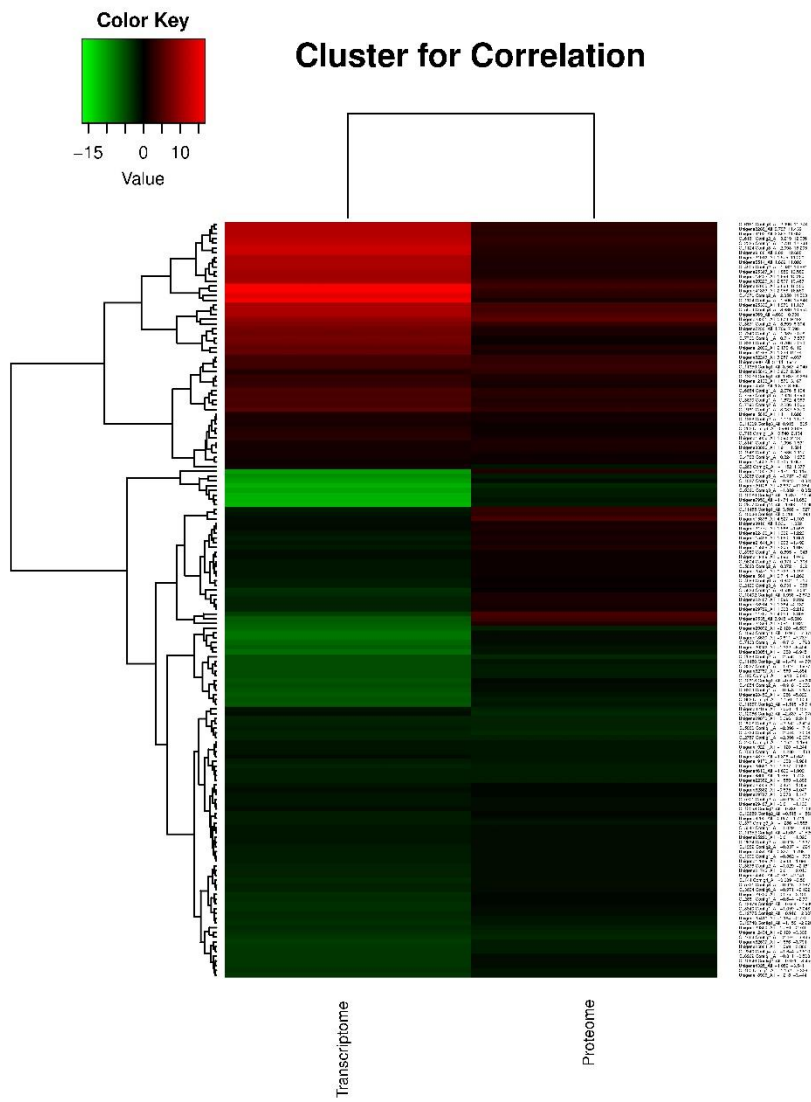

# 109 DAP-vs- 25 DAP

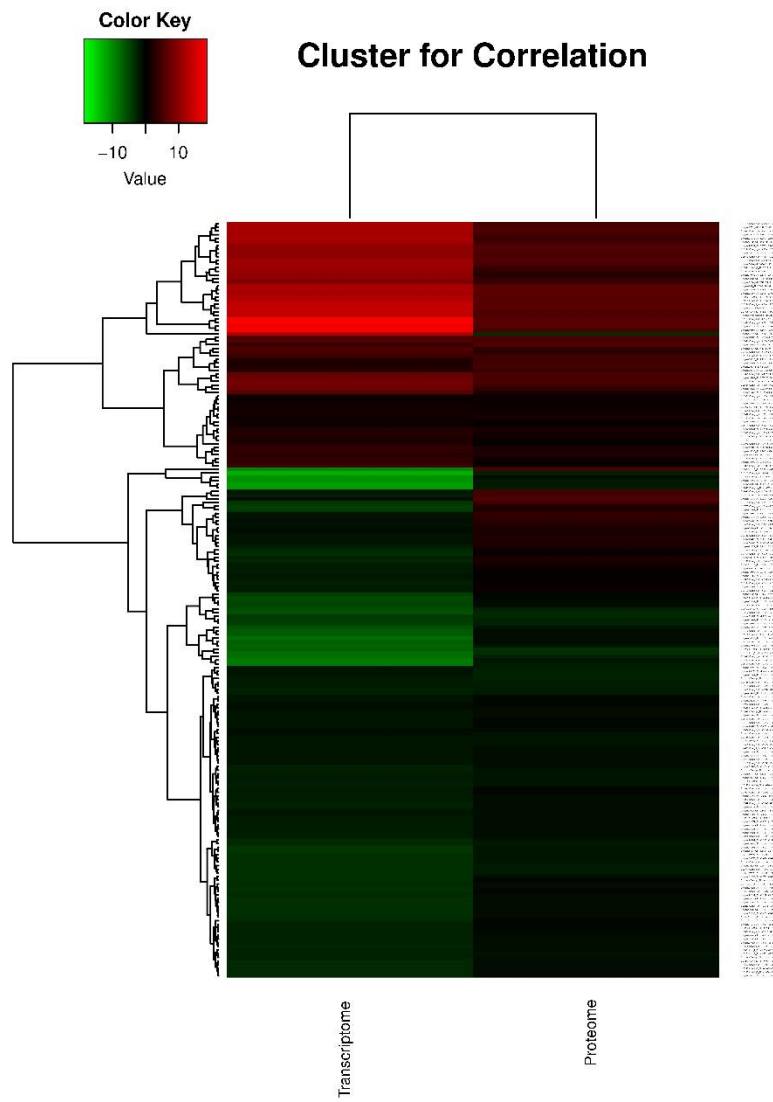

Supplement: 41438_2019_194_MOESM1_ESM.pdf [file 41438_2019_194_MOESM1_ESM.pdf]
